1 **Species Designations Belie Phenotypic and Genotypic Heterogeneity in Oral Streptococci**

2  
3 Irina M. Velsko<sup>1†</sup>, Brinta Chakraborty<sup>2†</sup>, Marcelle M. Nascimento<sup>3</sup>, Robert A. Burne<sup>2</sup>, Vincent P.  
4 Richards<sup>1\*</sup>

5  
6 <sup>1</sup> Department of Biological Sciences, Clemson University, Clemson, SC 29634 USA

7 <sup>2</sup> Department of Oral Biology, College of Dentistry, University of Florida, Gainesville, FL 29630  
8 USA

9 <sup>3</sup> Department of Restorative Dental Sciences, Division of Operative Dentistry, College of  
10 Dentistry, University of Florida, Gainesville, FL, 29630 USA.

11 † These authors contributed equally

12  
13 \* Corresponding author:

14 Vincent P. Richards

15 Department of Biological Sciences

16 College of Science

17 Clemson University

18 Clemson, SC 29634

19 Email: [vpricha@clemson.edu](mailto:vpricha@clemson.edu)

20 Telephone: 864-656-2207, Fax: 864-656-0435

21

22

23 **Abstract**

24 Health-associated oral *Streptococcus* species are promising probiotic candidates to protect  
25 against dental caries. Ammonia production through the arginine deiminase system (ADS), which  
26 can increase the pH of oral biofilms, and direct antagonism of caries-associated bacterial species  
27 are desirable properties for oral probiotic strains. ADS and antagonistic activities can vary  
28 dramatically among individuals, but the genetic basis for these differences is unknown. We  
29 sequenced whole genomes of a diverse set of clinical oral *Streptococcus* isolates and examined the  
30 genetic basis of variability in ADS and antagonistic activities. A total of 113 isolates were included  
31 and represented ten species: *S. australis*, A12-like, *S. cristatus*, *S. gordonii*, *S. intermedius*, *S. mitis*,  
32 *S. oralis* including *S. oralis* subsp. *dentisani*, *S. parasanguinis*, *S. salivarius*, and *S. sanguinis*.  
33 Mean ADS activity and antagonism on *Streptococcus mutans* UA159 were measured for each  
34 isolate, and each isolate was whole genome-shotgun sequenced on an Illumina MiSeq. Phylogenies  
35 were built of genes known to be involved in ADS activity and antagonism. Several approaches to  
36 correlate the pan-genome with phenotypes were performed. Phylogenies of genes previously  
37 identified in ADS activity and antagonism grouped isolates by species but not by phenotype.  
38 GWAS identified additional genes potentially involved in ADS activity or antagonism across all  
39 the isolates we sequenced as well as within several species. Phenotypic heterogeneity in oral  
40 streptococci is not necessarily reflected by genotype and is not species-specific. Probiotic strains  
41 must be carefully selected based on characterization of each strain, and not based on inclusion  
42 within a certain species.

43  
44 **Importance**

45 Representative type strains are commonly used to characterize bacterial species, yet species  
46 are phenotypically and genotypically heterogeneous. Conclusions about strain physiology and  
47 activity based on a single strain therefore may be inappropriate and misleading. When selecting  
48 strains for probiotic use, the assumption that all strains within a species share the same desired  
49 probiotic characteristics share those characteristics may result in selection of a strain that lacks the  
50 desired traits, and therefore makes a minimally effective or ineffective probiotic. Health-associated  
51 oral streptococci are promising candidates for anti-caries probiotics, but strains need to be carefully  
52 selected based on observed phenotypes. We characterized the genotype and anti-caries phenotypes  
53 of strains from ten species of oral Streptococci and demonstrate poor correlation between genotype  
54 and phenotype across all species.

55  
56

## 57 Introduction

58 Dental caries is a significant health problem and the most common oral infectious disease,  
59 causing substantial morbidity worldwide. Caries develop when the tooth enamel is demineralized  
60 through successive exposure to low pH, a condition driven by fermentation of dietary  
61 carbohydrates into organic acids by acidogenic oral bacterial species. Treatment for caries can be  
62 expensive, and disease prevention is a major goal of oral healthcare research.

63 The use of orally-administered probiotic species is gaining popularity as a strategy for  
64 maintaining oral health. This involves introducing bacterial strains to the oral cavity with the goal  
65 of promoting growth and metabolic activity of a health-associated oral biofilm, while suppressing  
66 growth and metabolic activity of disease-associated species. Several studies have demonstrated  
67 successful *in vivo* and *in vitro* application of dairy product-derived oral probiotic species,  
68 predominantly lactobacilli, highlighting the potential of probiotics in oral healthcare. Select strains  
69 of lactobacilli inhibit growth and biofilm formation of caries-associated species *Streptococcus*  
70 *mutans* and *Candida albicans* in culture (1-3), which is a prime caries prevention strategy. *In vitro*  
71 biofilm growth assays demonstrated that strains of *Lactobacillus*, *Lactococcus*, and *Streptococcus*  
72 can integrate into saliva-derived or defined-species biofilms and are maintained in the biofilms  
73 over several days (4-8). However, an *in vivo* study reported that no probiotic lactobacilli were  
74 detected in dental plaque of individuals after 8-day treatment with fermented milk (9), so the  
75 method by which such probiotic strains act on the biofilm *in vivo* needs to be further investigated.

76 In addition to food-derived probiotic strains, there are many bacterial species in dental  
77 plaque that are associated with health, which may be mined for probiotic potential. These oral  
78 species have the advantage of being adapted to growth in the mouth and the oral biofilm, and may  
79 offer more sustainable and longer-term probiotic benefits than species from external sources like  
80 dairy products. In particular, several *Streptococcus* species including *S. gordonii*, *S. sanguinis*, and  
81 *S. salivarius* are associated with oral health (10-12), and *S. salivarius* K12 has been adapted as a  
82 probiotic for pharyngitis/tonsillitis (13), halitosis (14), and otitis media (15).

83 Buffering biofilm pH through ammonia production is a promising health-associated  
84 activity of oral Streptococci (10). The arginine deiminase system (ADS) is a dominant method  
85 used by Streptococci to produce ammonia from arginine. This pathway has been extensively  
86 characterized in *S. gordonii* (16-19) and consists of an operon containing five genes encoding  
87 structural proteins: *arcA* (arginine deiminase), *arcB* (ornithine carbamoyltransferase), *arcC*  
88 (carbamate kinase), *arcD* (arginine-ornithine antiporter), and *arcT* (putative transaminase or  
89 peptidase); and two regulatory genes immediately downstream that are co-transcribed in the  
90 opposite direction from the operon: *arcR* and *queA*, which are essential for optimal ADS activity  
91 in *S. gordonii* (16). Additionally, upstream of *arcA* is *flp*, another regulatory element involved in  
92 ADS activity (17). Expression of the ADS operon is regulated by environmental factors, including  
93 the presence of arginine (18), sugar carbon source (17), and the presence of oxygen (18, 20).  
94 Strains with defective ADS expression or regulation are more sensitive to pH-induced killing (19),  
95 suggesting this pathway is important for maintaining health-associated species in the presence of  
96 acidogenic species.

97 Use of arginine-containing toothpaste and mint prebiotics to boost ADS activity in plaque  
98 and protect against caries development and progression is also a promising method to promote  
99 health-associated activity in oral biofilms (21-24). As arginine directly affects growth and  
100 pathogenesis of *S. mutans* (25), developing probiotics that target arginine metabolism maybe  
101 especially effective in preventing caries (26). Arginine catabolism is clinically relevant to caries  
102 development. Clinical studies have shown that ADS activity is higher in plaque and saliva of  
103 patients who have never had caries than patients with active caries, both in adults (27) and children  
104 (28). Further, Nascimento, *et al.* (2009) found an inverse relationship between ADS activity and  
105 abundance of *S. mutans* in plaque samples. Unexpectedly, they found no correlations between the  
106 abundance of health-associated *Streptococcus* species and ADS activity level, while some plaque  
107 samples from caries sites had high ADS activity (28). They concluded that there must be more to  
108 ADS activity than simply the presence or abundance of health-associated streptococci.

109 Recent phenotypic characterization of ADS activity in a variety of oral *Streptococcus*  
110 species grown in different conditions (arginine availability, pH, carbohydrate source, oxygen  
111 tension) showed substantial variation in activity within and between species and within growth  
112 conditions (29). This confirmed the conclusion of Nascimento, *et al.* (2013) that no health-  
113 associated *Streptococcus* species are collectively associated with ADS activity, rather, ADS  
114 activity is highly strain-specific. In addition, these clinical isolates had a range of ability to  
115 antagonize growth of *S. mutans* (29), also a desirable trait in a probiotic strain. The genetic basis  
116 for variability in ADS activity and *S. mutans* antagonism has not yet been examined, but may  
117 provide insight for probiotic development. Rational selection of probiotic strains is particularly  
118 important because of the genotypic and phenotypic heterogeneity within oral *Streptococcus*  
119 species. Here we examined the probiotic properties and genome composition of a wide variety of  
120 oral *Streptococcus* species isolated from dental plaque. We show substantial phenotypic and  
121 genotypic heterogeneity of all species examined, which has implications for targeted probiotic  
122 strain selection.

123

## 124 **Results**

### 125 *Species assignments*

126 A total of 113 *Streptococcus* species were isolated from supragingival dental plaque  
127 samples, characterized for ADS activity and antagonism on and by *S. mutans* UA159, and whole  
128 genome shotgun sequenced. Nine species were identified by 16S rRNA gene sequencing of 106  
129 isolates, and seven isolates could not be identified at species-level. Core genome analysis  
130 confirmed that we characterized and sequenced two *S. australis*, two A-12-like isolates, eleven *S.*  
131 *cristatus*, seventeen *S. gordonii*, eleven *S. intermedius*, twenty-seven *S. mitis*, eight *S. oralis*, six  
132 *S. oralis* subsp. *dentisani*, twenty-five *S. sanguinis*, one each of *S. parasanguinis* and *S. salivarius*,  
133 and two for which a species could not be identified as they grouped with the *S. mitis/S. oralis*  
134 complex in the phylogeny (Figure S1, Table S1). Given that previous work has placed *S. oralis*  
135 subsp. *dentisani* as a distinct subclade of *S. oralis* (50), we performed all analyses by both grouping  
136 all together and keeping them as separate groups. Likewise, the *S. australis* and A12-like isolates

137 were grouped together for all analyses because we had only two isolates of each and they more  
138 closely related to each other than to other *Streptococcus* species (51). Based on the core genome  
139 phylogeny of our isolates, the phylogenetic relationships of the species we sequenced follow the  
140 branching patterns reported for these species within the genus *Streptococcus* (52) with the  
141 exception that *S. oralis*, *S. mitis*, and *S. oralis* subsp. *dentisani* are intermixed within their clade  
142 with no clear species groupings (Figure S1).

143  
144 *Heterogeneity of arginine deiminase activity and antagonism on S. mutans within diverse*  
145 *Streptococcus species*

146 Phenotypic heterogeneity was shown by the range of ADS activity and antagonism on *S.*  
147 *mutans* antagonism within strains of each species (Figure 1, Table 1). As arginine deiminase  
148 activity was first described in *S. gordonii* DL1, we used *S. gordonii* as the reference group for our  
149 statistical tests. *Streptococcus mitis*, *S. oralis*, and *S. oralis* + *S. oralis* subsp. *dentisani* each had  
150 significantly lower ADS activity by one-way ANOVA than *S. gordonii* (Figure 1A, Table 1). The  
151 large standard deviations demonstrate substantial species phenotypic diversity, particularly in *S.*  
152 *gordonii* and *S. sanguinis*. A single isolate of *S. oralis* subsp. *dentisani* had exceptionally high  
153 ADS activity for the species (half-filled circle Figure 1), and was responsible for that group's large  
154 standard deviation. The *S. australis* and A12-like isolates separated into two clusters, with the  
155 A12-like isolates (half-filled circles Figure 1A) exhibiting higher average ADS activity than the *S.*  
156 *australis* isolates (filled circles).

157 Antagonism towards *S. mutans* was variable within each species and not correlated with  
158 mean ADS activity. We compared the mean antagonistic activity of each species to *S. gordonii* for  
159 consistency with the ADS activity comparisons, and found that *S. intermedius* and *S. sanguinis*  
160 had significantly lower antagonism than *S. gordonii* (Figure 1B, Table 1). *Streptococcus gordonii*  
161 and *S. australis*/A12-like isolates all exhibited antagonism towards *S. mutans*, while *S. intermedius*  
162 was the only species with no isolates that exhibited antagonism, and all other species had isolates  
163 with a range of antagonism from none to high (Figure 1B). The single *S. salivarius* isolate had low  
164 ADS activity and was not antagonistic towards *S. mutans*, while the single *S. parasanguinis* had  
165 very high ADS activity and low antagonism. Given the wide range of phenotypes within all other  
166 species represented here, it is not possible to speculate on whether these characteristics are  
167 representative of *S. salivarius* and *S. parasanguinis*. However, previous studies from our lab have  
168 shown that *S. salivarius* is an abundant producer ammonia via urease enzyme by which they help  
169 to maintain the oral biofilm pH homeostasis (10).

170  
171 **Table 1.** Mean arginine deiminase activity and *S. mutans* antagonism of diverse *Streptococcus*  
172 species.

| Species                       | No. isolates | Mean ADS activity     |                      |
|-------------------------------|--------------|-----------------------|----------------------|
|                               |              | (nmol/min/mg protein) | Mean Antagonism (mm) |
| <i>S. australis</i> /A12-like | 4            | 432 ±116              | 1.4 ± 0.2            |

|                                                             |    |               |            |
|-------------------------------------------------------------|----|---------------|------------|
| <i>S. cristatus</i>                                         | 11 | 149 ± 68      | 1.0 ± 0.7  |
| <i>S. gordonii</i>                                          | 17 | 325 ± 159     | 0.9 ± 0.4  |
| <i>S. intermedius</i>                                       | 11 | 417 ± 169     | 0 ± 0      |
| <i>S. mitis</i>                                             | 27 | 83.7 ± 125*** | 0.6 ± 0.7  |
| <i>S. oralis</i>                                            | 8  | 58.8 ± 37**   | 0.28 ± 0.5 |
| <i>S. oralis</i> subsp. <i>dentisani</i>                    | 6  | 156 ± 291     | 0.91 ± 0.9 |
| <i>S. oralis</i> + <i>S. oralis</i> subsp. <i>dentisani</i> | 14 | 100 ± 199**   | 0.56 ± 0.8 |
| <i>S. parasanguinis</i>                                     | 1  | 688           | 1.9        |
| <i>S. salivarius</i>                                        | 1  | 46.8          | 0          |
| <i>S. sanguinis</i>                                         | 25 | 311 ± 220     | 0.22 ± 0.4 |
| <i>Strep.</i> species                                       | 2  | 5.72 ± 2.6    | 0.89 ± 0.8 |

173 All values are ± SD.

174 \* p < 0.05 vs. *S. gordonii*

175 \*\* p < 0.01 vs. *S. gordonii*

176 \*\*\* p < 0.001 vs. *S. gordonii*

177

178 *Distribution of the ADS operon in the genus Streptococcus*

179 To better understand the distribution of the ADS operon within the genus *Streptococcus*  
 180 and to correlate the presence of the ADS operon within our oral isolates, we manually searched  
 181 for the operon in a custom-built database of *Streptococcus* RefSeq genomes, and performed  
 182 BLAST searches of the operons found manually against the *Streptococcus* database to look for  
 183 other genomes with the operon. The entire operon *arcABCDT* and *arcRqueA* were identified in *S.*  
 184 *constelatus* (70%), *S. cristatus* (100%), *S. gordonii* (96%), *S. intermedius* (75%), *S. parasanguinis*  
 185 (70%), and *S. sanguinis* (97%), all of which are oral species (Supplemental Table S2). Isolates  
 186 lacking *arcR* and *queA* were found in *S. mitis* (3.5%), *S. oralis* (5.2%), *S. oralis* subsp. *dentisani*  
 187 (54%) (9% of *S. oralis* + all *S. oralis* subspecies), *S. pneumoniae* (94%) and in *S. sp.* oral taxon  
 188 058. The remaining species that had ADS operon genes were *S. anginosus* (10%), *S. canis* (100%),  
 189 *S. dysgalactiae* (100%), *S. merionis* (100%), *S. pyogenes* (78%), and *S. uberis* (93%)  
 190 (Supplemental Table S2), yet in all cases the operon was not contiguous or complete. In some  
 191 species the order of the ADS genes had been rearranged, and in others additional genes or  
 192 transposons had been inserted without disrupting the genes. Therefore, it remains unclear if the  
 193 operon is functional in these species.

194

195 *Arginine deiminase activity does not correlate with genotype*

196 Arginine deiminase activity in *Streptococcus* is governed by the arginine deiminase  
 197 operon, which includes 5 structural genes *arcA*, *arcB*, *arcC*, *arcD*, and *arcT*, and the regulatory  
 198 genes *arcR* and *queA*, which are co-transcribed in the opposite direction from the structural genes  
 199 (20). The global nitrogen regulator *flp* is also involved in regulating expression of the operon (17),  
 200 and was annotated *ntcA* in our genomes. We identified each of these genes in our isolates to  
 201 compare phylogenetic relatedness with ADS activity. The annotation of these genes was not



202 consistent, sometimes *arcD* and *arcT* were annotated as “hypothetical protein” and “putative  
203 dipeptidase”, yet we confirmed a full, contiguous operon and associated regulatory genes as  
204 described in the methods. All eight genes (*ntcA*, *arcA-T*, *arcR*, *queA*) were present in all isolates  
205 of *S. australis*/A12-like, *S. cristatus*, *S. gordonii*, *S. sanguinis*, and the single *S. parasanguinis*  
206 isolate, but were not detected in the *S. salivarius* isolate or the three unidentified species isolates  
207 (Supplemental Table S1). Two of the *S. sanguinis* isolates have a 3-gene insertion between *arcC*  
208 and *arcD* that includes *ydgl* and *aspC*, and a duplicated *arcC*, yet this does not appear to have  
209 impaired their ADS activity (Supplemental Table S1). Nine of eleven *S. cristatus* isolates had all  
210 eight genes and the remaining two isolates had none. Very few isolates of *S. mitis* and *S. oralis*  
211 had any genes in the operon, and when present *ntcA* and *arcABCDT* were there, but not *arcR* or  
212 *queA*. Six of the 21 *S. mitis* isolates (29%), one of the eight *S. oralis* isolates (12%), and five of  
213 the 6 *S. oralis* subsp. *dentisani* (83%) isolates had this part of the operon (Supplemental Table S1).  
214 The distribution of the ADS operon in our isolates is similar to its distribution in the RefSeq  
215 genomes of these species examined above (Supplemental Table S2). Only one of these genes,  
216 *arcD*, tested positive for recombination with phi.

217 We built phylogenies of three versions of the full operon region including all intergenic  
218 regions, one *arcABCDT+arcRqueA* (Figure 2A, B), one *nctA+arcABCDT+arcRqueA* (Figure  
219 S3A, B), and one *arcABCDT* (Figure S4A, B) to assess the phylogenetic relatedness of the operon  
220 and regulatory elements, and to determine whether the ADS activity of each isolate is related to  
221 genotype. We then built individual phylogenies for each of the eight genes (Figure S5). The  
222 isolates grouped by species in each operon phylogeny, and gene consensus trees showed similar  
223 branching patterns (Figures 2C, S3C, S4C). Branching patterns in each phylogeny closely  
224 matched those of the *Streptococcus* genus phylogeny (52). Like the core phylogeny though, the *S.*  
225 *mitis*, *S. oralis* and *S. oralis* subsp. *dentisani* isolates are intermixed within their own clade. Heat  
226 maps presenting the mean ADS activity for each isolate aligned with the phylogenies (Figures 2,  
227 S3, S4, S5) do not show clear correlations between ADS activity and the species groups or the  
228 branching patterns within each species. In the *arcR* phylogeny (Figure S5, S6A), the *S. cristatus*  
229 isolates split into two groups because the five isolates in the clade more distant to the *S. gordonii*,  
230 *S. intermedius*, and *S. sanguinis* isolates have a very short *arcR* sequence. The short *arcR*  
231 sequences are genuinely short and not an artefact of assembly such as truncation due to being  
232 located at the end of a contig, and removing them from the phylogeny does not alter the branching  
233 patterns delineating the species clades (Figure S6B).

234  
235 *Antagonism of S. mutans does not correlate with known antagonism-related genotypes*

236 It was previously shown that targeted loss of the gene for the H<sub>2</sub>O<sub>2</sub>-generating pyruvate  
237 oxidase (*spxB*) or the gene for the serine protease challisin of *S. gordonii* DL1 and *Streptococcus*  
238 A12, which degrades an intercellular signal molecule for *S. mutans* bacteriocin production, reduces  
239 antagonism of these strains towards *S. mutans* (51), so we examined the phylogenetic relatedness  
240 of these genes in our isolates. The pyruvate oxidase gene, annotated *pox5* rather than *spxB*, was  
241 present in all isolates of *S. australis*/A12-like, *S. cristatus*, *S. gordonii*, *S. oralis*, *S. oralis* subsp.

242 *dentisani*, *S. parasanguinis*, and *S. sanguinis*. We confirmed that this gene is equivalent to *S.*  
243 *gordonii* strain Challisin *spxB* by including that gene in our alignment and building a tree that  
244 included *spxB* (Figure S7). All but one *S. mitis* isolate carried the gene and both undefined species  
245 isolates carried it, while only a single isolate of *S. intermedius* carried it. The *pox5* phylogeny is  
246 not strictly grouped by species like the *arc* gene phylogenies (Figure 3A), and the gene tested  
247 positive for recombination with phi. The majority of *S. sanguinis* isolates cluster together, and  
248 there is a distinct clade of *S. mitis/S. oralis/S. oralis* subsp. *dentisani*, yet the remaining isolates  
249 form mixed-species clades. The heatmap of mean antagonism activity aligned with the tree in  
250 Figure 3A shows no clear relationship between gene phylogeny and antagonistic activity measured  
251 in aerobic conditions.

252 The challisin gene was found only in *S. gordonii* and *S. sanguinis* isolates and was  
253 annotated *scpA*, a C5a protease. The gene was present in all *S. gordonii* isolates, but only twelve  
254 of twenty-five *S. sanguinis* isolates (Figure 3B). In the phylogeny the isolates cluster by species,  
255 and the short branches within the species show there is very little variation in the gene sequences.  
256 It has not been shown that challisin itself has antagonistic activity, but it might enhance antagonism  
257 by diminishing the amount of bacteriocins that *S. mutans* can produce, thereby allowing for better  
258 growth and production of antagonistic factors by the commensal. However, although more *S.*  
259 *gordonii* isolates have high antagonism than do *S. sanguinis* isolates, the heatmap of antagonism  
260 shows no clear correlation between the challisin phylogeny and antagonism activity. Like *pox5*,  
261 *scpA* tested positive for recombination with phi.

262  
263 *Genus- and species-specific genes potentially involved in ADS activity and antagonism*

264 To search for additional genes that may be involved in ADS activity or *S. mutans*  
265 antagonism we screened our isolates using two approaches to detect bacterial *pan-genome-*  
266 *phenotype* - association. We searched for genes associated with these phenotypes across all of our  
267 isolates, as well as within each of the species groups. Using the first approach (Scoary) no  
268 significant associations between gene clusters and phenotype were found when running 100  
269 permutations and a Benjamini-Hochburg corrected p-value cutoff of 0.05. In contrast, using the  
270 second approach (treeWAS) we found sets of genes significantly associated with ADS activity and  
271 antagonism across all species, as well as within *S. mitis*, *S. oralis*, and *S. sanguinis* (Supplemental  
272 Table S3). Several of the genes associated with ADS activity in all *Streptococcus* isolates we  
273 sequenced are involved in arginine processing, including arginine transport system permease *artQ*,  
274 arginine decarboxylase, and arginine-binding extracellular protein *artP* precursor (Supplemental  
275 Table S3), while several others were involved in outer membrane transport or other seemingly  
276 unrelated processes, or were hypothetical proteins. Fewer genes were associated with antagonism  
277 in all *Streptococcus* isolates than with ADS activity, and included DNA-binding transcriptional  
278 repressor *acrR*, a type-1 restriction enzyme R protein, and a bacteriophage holin.

279 None of the genes associated with ADS activity or antagonism in the full set of isolates  
280 were identified in any of the species-specific tests for association. *S. oralis* and *S. oralis* + *S. oralis*  
281 subsp. *dentisani* both had a single gene associated with antagonism, *amiA1* encoding oligopeptide-



282 binding protein AmiA, which was also identified in the *S. mitis* GWAS (Supplemental Table S3).  
283 *S. sanguinis* had six genes associated with ADS activity, three of which were hypothetical proteins.  
284 One gene, annotated carbamoyl phosphate synthase-like protein, is involved in arginine  
285 metabolism, while the relation of the remaining two annotated genes, enterobactin exporter EntS  
286 and UDP-N-acetylglucosamine 1-carboxyvinyltransferase 2, to ADS activity is not clear  
287 (Supplemental Table S3). A single gene, transcriptional regulator *mtrRI*, was associated with  
288 antagonism in *S. sanguinis*. None of the remaining species groups had any genes significantly  
289 associated with ADS activity or antagonism.

290

## 291 Discussion

292 We performed a genome-wide study of a phylogenetically and phenotypically diverse set  
293 of oral streptococci isolated from health-associated supragingival dental plaque to characterize the  
294 genotypic basis of variation in ADS activity and antagonism of *S. mutans*. We demonstrated that  
295 these two phenotypes vary substantially within and between species, yet the phylogenetic  
296 relationship of the genes associated with these phenotypes through earlier studies do not reflect  
297 the actual phenotypes. Our results support the observation (18) that differences in transcriptional  
298 or translational control may influence the expression of genes responsible for these phenotypes  
299 more than the gene sequences themselves.

300 The ADS operon genes are widely-distributed in *Streptococcus*, but appear to be  
301 maintained as a contiguous (and presumably functional) operon predominantly in the oral  
302 *Streptococcus* species. This may be directly related to their lifestyle in oral biofilms, which are  
303 frequently acidified by other biofilm species, in contrast to other *Streptococcus* species such as *S.*  
304 *pyogenes* or *S. uberis*, which are not known to inhabit dense biofilms that are commonly subjected  
305 to frequent acidification. However, the operon is clearly functional in the *Streptococcus* species  
306 we screened when not contiguous or when lacking regulatory genes. Insertion of 3 genes between  
307 *arcC* and *arcD* in two *S. sanguinis* strains was not associated with diminished ADS activity, and  
308 despite the *S. mitis* or *S. oralis* strains with the operon missing *arcR* and *queA*, AD activity is still  
309 expressed. While the average ADS activities for *S. mitis* and *S. oralis* are lower than other strains,  
310 the lack of *arcR* and *queA* does not necessarily explain this, as several strains in *S. gordonii*, *S.*  
311 *cristatus*, and *S. salivarius* have these regulatory genes yet have low ADS activity.

312 Regulation of the ADS operon is complex and it is not surprising that there is no clear  
313 relationship between operon genotype and ADS activity. Expression can be repressed by oxygen,  
314 enhanced at low pH, and increased by arginine concentration, and involves several regulatory  
315 genes, carbohydrate catabolite repression, and two-component systems (20). Many genes are  
316 involved in ADS pathway activation, and this network of regulation may determine expression  
317 levels that are unrelated to the sequence of the structural genes. This regulatory network can be  
318 identified by functional studies, but not genomic studies alone. In addition, post-transcriptional  
319 control of the ADS operon may be important in determining expression levels (20), which again  
320 cannot be captured by genomic surveys.

321 The phylogenetic relationships of antagonism-associated genes pyruvate oxidase, which  
322 produces H<sub>2</sub>O<sub>2</sub> that inhibits *S. mutans* directly, and challisin, which interferes with *S. mutans*  
323 bacteriocin production potentially reducing fitness of *S. mutans*, within the isolates that we  
324 sequenced do not correlate with the antagonism phenotypes of each isolate, just as we saw for  
325 ADS activity genotype and phenotype. There are some clusters of species within the *pox5* pyruvate  
326 oxidase phylogeny, but the species groups are much more mixed than was seen with any of the  
327 ADS operon genes, which suggests that this gene may be subject to horizontal transfer. The *pox5*  
328 gene tested positive for recombination with phi, which supports horizontal transfer between  
329 *Streptococcus* species. Similar to the ADS operon gene phylogenies, there is no clear correlation  
330 between *pox5* genotype and antagonism phenotype, with the exception of *S. intermedius*. None of  
331 the *S. intermedius* isolates were antagonistic towards *S. mutans*, and only a single isolate had the  
332 *pox5* gene. Although the challisin gene shows a distinct species-related phylogenetic signal, it  
333 shows no correlation with antagonism phenotype. The indistinct relationships between pyruvate  
334 oxidase genotype and antagonism as well as challisin genotype and antagonism may again be  
335 related to the transcriptional, translation, and/or post-translational control of these genes, or in the  
336 case of challisin to differences in substrate specificity of the enzyme.

337 Our genome-wide association studies did not report associations between ADS activity or  
338 antagonism and the genes involved in these phenotypes for which we built phylogenies. Given the  
339 complex network regulating ADS operon expression discussed above, this is not surprising.  
340 However, several genes that were identified by treeWAS as significantly associated with ADS  
341 activity are involved in arginine processing, and therefore the genes identified by this method  
342 should be investigated by functional studies for their role in arginine processing and ammonia  
343 production. Our small sample size, especially for the individual species groups, may prevent us  
344 from finding significantly associated genes, and these GWAS studies should be performed with  
345 more isolates to obtain better power, particularly if functional interrelationships can be established  
346 with the gene products we identified using TreeWas and ADS levels.

347 A single isolate each of *S. salivarius* and *S. parasanguinis*, but also included two isolates  
348 similar to the recently-described strain A12 (51) based on 16S rRNA gene similarity, were  
349 included in our analysis. *S. salivarius* is the most distantly related of the *Strep.* species we included  
350 (52), and the isolate we sequenced did not contain any ADS operon genes. None of the 44 RefSeq  
351 *S. salivarius* genomes we screened had the ADS operon, so this species may rely instead on the  
352 urease gene cluster to produce ammonia to counter drops in pH (10). However, the full urease  
353 operon (53) was only present in our *S. salivarius* isolate but none of our other isolates. Urease  
354 activity is higher in plaque from caries-free than caries-active adults (27), so this pathway may  
355 desirable in probiotic strains. More *S. salivarius* strains will need to be characterized for ammonia  
356 production and *S. mutans* antagonism to understand the range of ammonia production in this  
357 species, and its potential as a probiotic. In contrast, the *S. parasanguinis* isolate had high ADS  
358 activity and moderately antagonized *S. mutans*, and the range of activity in this species should also  
359 be further investigated.

360 *S. australis* and the A12-like isolates, which are phylogenetically closely related (51), have  
361 moderate to high ADS activity and *S. mutans* antagonism. This finding supports earlier conclusions  
362 that this species may make an excellent probiotic candidate (51). The A12-like isolates are rare,  
363 and our plaque screens identified only 2, both of which we included in this study. What the  
364 infrequent isolation of A12-like organisms means for the ecology of this organism in the mouth  
365 and plaque biofilm is uncertain, and the ability of this organism to integrate and be maintained in  
366 the oral biofilm of patients who do not naturally carry it will need to be studied. Unfortunately, a  
367 retrospective examination of microbiome studies that used 16S rRNA gene sequencing would not  
368 be informative as the 16S rRNA gene of A12-like organisms, *S. australis*, and *S. parasanguinis*  
369 share 99% identity with the cannot easily be distinguished. Whether A12-like isolates are strains  
370 of *S. australis* or a distinct species is unclear from our core and gene phylogenies. We are in the  
371 process of obtaining, characterizing and sequencing more A12-like isolates to clarify the  
372 relationship between this species and *S. australis*, and its placement in the phylogeny of the genus  
373 *Streptococcus*.

374 In sum, we have shown that the extensive variation in ADS activity and *S. mutans*  
375 antagonism within oral *Streptococcus* species cannot be solely explained by genotypic variation.  
376 Complex regulation of these phenotypes may explain the differences within and between species,  
377 but cannot be assessed by gene sequence analysis or genome-wide surveys. To develop probiotics  
378 that take advantage of ammonia production and growth inhibition of *S. mutans*, strains will need  
379 to be carefully selected based on laboratory screening and phenotypic characterization, and not on  
380 species designation alone.

381

## 382 **Materials and Methods**

### 383 *Plaque collection and bacterial strain isolation*

384 Supragingival dental plaque was collected from both children (n=29) and adult (n=11)  
385 caries free individuals, those having no clinical evidence of present or prior dental caries activity  
386 [decayed, missing and filled teeth (DMFT) = 0]. Informed consent was obtained from all  
387 participating subjects (parents in case of children) under reviewed and approved protocols by the  
388 Institutional Review Board of the University of Florida Health Science Center (approval number  
389 IRB201600154 for children's study and IRB201600297 for adult study). Children and adult  
390 individuals were required to refrain from oral hygiene procedures for 8 and 12 hours prior to the  
391 collection of dental plaque, respectively. Plaques samples were collected from teeth surfaces using  
392 sterile periodontal curettes, then transferred to sterile, chilled microcentrifuge tubes containing 10  
393 mM sodium phosphate buffer (pH 7.0) and stored at -80° C until further analysis. to isolate  
394 cultivable oral *Streptococcus* species (27, 30), plaque samples were dispersed by external  
395 sonication (FB120, Fisher Scientific, Hampton, NH, USA) for 2 cycles of 15 seconds with 30  
396 seconds cooling on ice in between. 10 µl of the dispersed plaque samples were then serially diluted  
397 in 10 mM sodium phosphate buffer (pH 7.0) and 100 µl of the diluted samples (10<sup>-4</sup> to 10<sup>-7</sup>) were  
398 plated on sheep blood agar (Columbia agar base containing 5% v/v of anticoagulated sheep blood,  
399 Difco Laboratories, Michigan, USA) and on BHI (Difco Laboratories) agar. Plates were placed in

400 anaerobic jars (BBL GasPak™ Systems, BD Diagnostics, Md, USA) and incubated at 37° C  
401 incubator for 48 hours. Colonies of all clinical isolates from both blood agar and BHI agar plates  
402 were collected and further sub-cultured on the same media and incubated subsequently in 5% CO<sub>2</sub>  
403 aerobic incubator until pure colonies were obtained.

404

#### 405 *Preliminary species identification by 16S rRNA gene sequencing*

406 To select only *Streptococcus* isolates for biochemical characterization, we sequenced the  
407 16S rRNA gene of our clinical isolates to assign each to a species. An optimized polymerase chain  
408 reaction using universal primer set (forward: 5'-AGA GTT TGA TCC TGG CTC AG-3', reverse:  
409 5'-TAC GGG TAC CTT GTT ACG ACT 3') was used to amplify the full 16S rRNA gene from  
410 each clinical isolate (31). PCR products were then cleaned using Qiaquick PCR cleanup kit  
411 (Qiagen, Valencia, Calif., USA) and sequenced by Sanger sequencing at the University of Florida  
412 Interdisciplinary Center for Biotechnology (UF-ICBR) for primary identification of isolated  
413 bacterial species. A putative species designation for each isolate was determined by a nucleotide  
414 BLAST search using the online BLAST search engine at NCBI with default parameters against  
415 the 16S ribosomal RNA sequences (Bacteria and Archaea) database, and hit with the highest bit  
416 score was selected.

417

#### 418 *ADS Activity*

419 All isolated clinical oral streptococci (total 114) were tested for their potential to generate citrulline  
420 from arginine via arginine deiminase system (ADS) by a protocol previously validated and  
421 published by our group (20). Briefly, a single colony of each clinical isolate was inoculated in  
422 tryptone-yeast extract (TY) broth containing 25 mM galactose and 10 mM arginine and incubated  
423 overnight at 37° C in 5% CO<sub>2</sub> aerobic incubator. Overnight cultures were then diluted (1: 20) in  
424 the same media until exponential phase (OD<sub>600</sub>= 0.5- 0.6). The cells were harvested, washed and  
425 resuspended in 10mM Tris-maleate buffer and further permeabilized with toluene- acetone (1:9)  
426 for the measurement of ADS activity. The total protein concentration of the cell suspension was  
427 also measured by using BCA protein estimation kit (Pierce, Waltham, Mass., USA) with known  
428 bovine serum albumin (BSA) as the standard. ADS activity level in the clinical isolates were  
429 normalized to protein content and represented as nanomoles of citrulline generated per minute per  
430 milligram of protein. *Streptococcus gordonii* DL1 was used as a reference strain for this assay.

431

#### 432 *Competition Assay*

433 BHI agar plates were used for competition assays between commensal streptococci and oral  
434 pathogen *Streptococcus mutans* UA159. Overnight cultures from single colonies were adjusted to  
435 OD<sub>600</sub> 0.5. A 6 µl of each culture was then spotted adjacent to each other on agar plates commensal  
436 first and UA159 24 hours later. All experiments were performed in aerobic conditions. ImageJ  
437 software was used to measure the zone of inhibition (in mm) between competing colonies on plate.

438

#### 439 *Statistical Analysis*

440 Statistical differences in mean ADS activity and mean *S. mutans* antagonism were calculated by  
441 one-way ANOVA using *S. gordonii* as the reference group with Bonferroni multiple test correction  
442 in Prism v7.0d. Graphs were generated using Prism v7.0d.

443

#### 444 *DNA isolation and Illumina sequencing*

445 For whole genome shotgun sequencing, genomic DNA were isolated from each commensal  
446 streptococci using Wizard<sup>®</sup> Genomic DNA Purification Kit (Promega, Madison, WI, USA) with  
447 some modifications. Briefly, 8 ml overnight culture of each isolate was harvested and resuspended  
448 in 480 µl of EDTA and appropriate lytic enzymes were added to the cell suspension (100 µl of 10  
449 mg/ml lysozyme and 2 µl of 5U/ µl of mutanolysin). Cells were harvested after an incubation of 1  
450 hour at 37°C. Then 600 µl of Nuclei Lysis Solution (provided by manufacturer) was added to the  
451 cell suspension and the samples were incubated at 80° C for 5 minutes. This step was necessary  
452 for the breakdown of the cell wall. RNase was added to cell lysate and incubated about an hour at  
453 37° C to inhibit RNA contamination while purifying genomic DNA. To minimize protein  
454 impurities, Protein Precipitation Solution (provided by manufacturer) was added to the RNase  
455 treated cell lysate and mixed by vigorous vortexing and incubated on ice for 5 minutes. The total  
456 cell lysate was then harvested and the supernatant containing the DNA sample was transferred to  
457 a fresh tube containing room temperature isopropanol. The supernatant was rotated at room  
458 temperature about an hour or until the thread-like strands of DNA formed a visible mass. Finally  
459 DNA was purified in nuclease-free water after two washes in 70% ethanol. Total DNA  
460 concentration was measured using NanoDrop<sup>™</sup> One Microvolume UV-Vis Spectrophotometer  
461 (ThermoFisher Scientific, Waltham, MA, USA) and DNA integrity was determined by 260/280  
462 ratio. DNA from each isolate was prepared for Next-Generation whole genome shotgun  
463 sequencing using 2-5ng DNA and the Illumina Nextera-XT library preparation and indexing kit.  
464 Libraries were built without deviation from the Illumina recommended protocol, but were  
465 normalized by hand, and not with the beads provided in the Nextera-XT kit. Libraries were pooled  
466 at a final concentration of 2nM, and sequenced on an Illumina MiSeq using the Illumina MiSeq  
467 v2 kit with paired-end sequencing and 250-bp reads. Reads were de-multiplexed by the Illumina  
468 software and the raw fastq files were further processed for analysis.

469

#### 470 *Read processing, assembly, annotation, and gene clustering*

471 Estimated coverage of each genome was calculated by multiplying the number of reads in  
472 each raw fastq file by the read length (250 bases) and then dividing by the average number of  
473 nucleotides in a Streptococcus genome (2.9Mbp). Coverage ranged from 20X-300X. Reads were  
474 quality-trimmed and genomes assembled using the program A5 (32) with default parameters, and  
475 assembly quality was assessed with quast v4.6.3 (33). Assembled genomes were annotated with  
476 Prokka v 1.11(34) using a *Streptococcus*-specific amino acid gene sequene database. For gene  
477 clustering, Prokka-annotated amino acid fasta files for the isolates we sequenced along with the  
478 *Streptococcus mutans* files were concatenated into one file, as well as the arginine deiminase genes  
479 *arcA*, *arcB*, *arcC*, *arcD*, *arcT*, *arcR* from *Streptococcus gordonii* strain Challis (NCBI accession



480 CP000725.1) for easy identification of these genes during analysis. Homologous genes among all  
481 genomes were delineated using the MCL algorithm (35) as implemented in the MCLBLASTLINE  
482 pipeline (available at <http://micans.org/mcl>). The pipeline used Markov clustering (MCL) to assign  
483 genes to homologous clusters based on an all-vs-all BLASTX search with DIAMOND v0.8.22.84  
484 (36) between all pairs of protein sequences using an  $E$  value cut-off of  $1e-5$ . The MCL algorithm  
485 was implemented using an inflation parameter of 1.8. Simulations have shown this value to be  
486 generally robust to false positives and negatives (37).

487

#### 488 *Species identification by core genome phylogeny*

489 For comprehensive identification, a core genome of single-copy genes present in all  
490 isolates we sequenced was determined from the MCL clustering. A total of 608 single-copy core  
491 gene clusters were identified, and these were aligned using MUSCLE (38) and checked for  
492 recombination using PhiPack (39). Genes identified as recombinant by all three tests (phi, NSS,  
493  $\max \chi^2$ ) were removed from the core gene group. The remaining 425 putatively non-recombinant  
494 single-copy core gene alignments were concatenated and the concatenated alignment was used to  
495 build a core phylogeny using phyML v. 3.0 (40) with the GTR+G substitution model. Bootstrap  
496 support was provided by generating 100 bootstrap replicates. The species designations for each  
497 isolate were compared between the 16S rRNA gene and core gene phylogeny and several  
498 discrepancies were found. All isolates were assigned to a species based on the core gene  
499 phylogeny.

500

#### 501 *Distribution of the ADS operon in the genus Streptococcus*

502 To determine the distribution of the contiguous ADS operon within the genus  
503 Streptococcus and our sequenced isolates, we built a comprehensive Streptococcus custom  
504 BLAST database using the software Geneious v7.0 (<https://www.geneious.com>). The database  
505 was built using Genbank files from RefSeq at NCBI and those generated by Prokka for our isolates.  
506 Consequently, the database contained assembled and annotated contigs and information regarding  
507 gene synteny was available. All RefSeq *Streptococcus* genomes were downloaded from NCBI on  
508 16 April 2018. Fifty genomes of *S. agalactiae*, *S. equi*, *S. pyogenes*, *S. pneumoniae*, *S. suis*, and  
509 *Streptococcus* of unidentified species were randomly selected for inclusion in the database, as there  
510 are many more entries of these species in NCBI than the other *Strep.* species. Half of the  
511 *Streptococcus mutans* genomes (94 of 187) were included in the database, and all of the *S. oralis*  
512 (85) and *S. mitis* (57) genomes were included because we were particularly interested in  
513 distribution of the ADS operon in oral *Streptococcus*. We used a total of 1083 *Streptococcus*  
514 genomes (Supplemental Table S4) to build the database within the software Geneious v7.0. To  
515 obtain a BLAST search query sequence of the contiguous operon we used Geneious to manually  
516 search for the *arcA* gene within the genome sequence of *S. gordonii* strain Challis ADS. This  
517 procedure located the operon within a genome and allowed extraction of its contiguous nucleotide  
518 sequence.

519

520 *Identification of genes involved in the arginine deiminase system*

521 Gene clusters representing genes in the ADS operon (*arcA*, *arcB*, *arcC*, *arcD*, *arcT*) were  
522 identified by the presence of *S. gordonii* strain Challis ADS pathway genes in those clusters. The  
523 sequences were extracted from the Prokka-annotated fasta files of each isolate by locus tags. We  
524 confirmed that each gene was part of the ADS operon in each isolate and not a homologous  
525 anabolic counterpart by checking that the locus tag for each gene was sequential with the other  
526 ADS operon gene locus tags, as well as confirming that the locus tags of individual genes matched  
527 those of the full operon sequence. The *arcR* and *queA* genes were confirmed by checking that the  
528 locus tags were sequential with and immediately downstream of the ADS operon, while the  
529 regulator *flp* was confirmed by checking that the locus tag was sequential with and immediately  
530 upstream of the ADS operon.

531 The full operon and regulatory genes were identified in our sequenced isolates by manually  
532 searching for the operon in a randomly selected representative isolate of each species and  
533 performing a BLAST search in Geneious as follows: the annotated genome of one isolate of each  
534 species in was searched for the *arcA* annotation and the full operon with regulatory genes *flp*, *arcR*  
535 and *queA* was selected and extracted. The extracted full operon was used as the query in a BLAST  
536 search against all of our sequenced isolates.

537

538 *Identification of genes involved in antagonism*

539 Homologous gene clusters representing the serine protease challisin and the pyruvate  
540 oxidase *spxB*, were identified by BLAST search using these genes from *S. gordonii* strain Challis  
541 as queries against the genomes of all isolates we sequenced. Homologues of *S. gordonii* strain  
542 Challis pyruvate oxidase gene *spxB* were annotated *pox5* in our isolates.

543

544 *Association of phenotype and genotype using known genes*

545 Each gene cluster (protease challisin and *spxB*) as well as the full ADS operon was aligned  
546 using MAFFT (41) in Geneious and a phylogeny generated using phyML with the GTR  
547 substitution model and SPR branch swapping. Branch support was generated via 100 bootstrap  
548 replicates. Then, a phylogeny based on the consensus of the separate phylogenies for each gene  
549 (gene-trees) (*arcA*, *arcB*, *arcC*, *arcD*, *arcT*, *arcR*, and *queAi*) was constructed using the Triple  
550 Construction Method as implemented in the program Triplec (42) (10,000 iterations). This  
551 procedure is based on the observation that the most probable three-taxon tree consistently matches  
552 the species tree (43). The method searches all input trees for the most frequent of the three possible  
553 rooted triples for each set of three taxa. Once found, the set of rooted triples are joined to form the  
554 consensus tree using the quartet puzzling heuristic (44). The method has been shown to outperform  
555 majority-rule and greedy consensus methods (45). All phylogenies were graphed using the R  
556 package ggtree (46). In addition, the alignment for each gene cluster was tested for recombination  
557 with PhiPack (37).

558

559 *Pan-genome-phenotype association*

560 We searched for genes associated with the phenotypes for our isolates using two genome-  
561 wide association approaches: Scoary (47) and treeWAS (48). For Scoary, the genomes of each  
562 species were clustered independently using Roary (49) and combined with binary coding of the  
563 phenotypes. treeWAS was run using both the individual species clustering obtaining from Roary  
564 and combined species clustering obtained using MCLblastline. The phenotypes for treeWAS were  
565 coded as both binary and continuous (Supplemental Table S1).

566  
567

## 568 **Acknowledgments**

569 The authors would like to thank Dr. Matthew L. Williams and Kyulim Lee for their help in initial  
570 isolation of clinical commensals, Pascale Nehme for assisting during ADS assays, and Kaylin  
571 Young for assistance with building libraries. This work was supported by the National Institutes  
572 of Health National Institute of Dental and Craniofacial Research R01DE25832 to R.A.B.

573

## 574 **Data Availability**

575 All genomes we sequenced for this study are available to download from the NCBI SRA under  
576 accession number [PRJNA480251](#).

577  
578

## 579 **Figure Legends**

580 **Figure 1.** Phenotypic diversity within diverse clinical oral streptococcus isolates. A. Mean ADS  
581 activity of each isolate included in this study. B. Mean antagonism of *S. mutans* UA159 of each  
582 isolate included in this study. Half-filled circles in *S. australis*/A12-like indicate the A12-like  
583 isolates. Half-filled circles in *S. oralis* subsp. *dentisani* and *S. oralis* + *S. oralis* subsp.  
584 *dentisani* indicate the same isolate. \*  $p < 0.05$ , \*\*  $p < 0.01$ , \*\*\*  $p < 0.001$ .

585

586 **Figure 2.** ADS operon genotype and ADS activity level. A. Maximum-likelihood phylogeny of  
587 the ADS operon and regulatory elements *arcABCDTRqueA* with heatmap indicating ADS activity  
588 level. B. Example of the ADS operon and control elements showing protein-coding and intergenic  
589 regions used to build the phylogeny in A, from *S. gordonii* strain Challis (top), and an *S. gordonii*  
590 isolate from this study (bottom). Note inconsistencies in gene annotation. C. Gene consensus tree  
591 of the individual ADS operon gene trees (*arcA*, *arcB*, *arcC*, *arcD*, *arcT*, *arcR*, *queA*) with heatmap  
592 indicating ADS activity level. Bootstrap values (%) are shown on major nodes.

593

594 **Figure 3.** Antagonism-associated genotype and phenotype. A. Maximum likelihood phylogeny of  
595 the pyruvate oxidase gene with heatmap indicating level of antagonism towards *S. mutans*.  
596 Bootstrap values were  $< 50\%$  for major nodes. B. Maximum likelihood phylogeny of the *challis*  
597 gene with heatmap indicating level of antagonism towards *S. mutans*. Bootstrap values (%) are  
598 shown on major nodes.

599

600 **Supplemental Tables**

601 **Table S1.** List of isolates sequenced in this study and their biochemical characteristics.

602 **Table S2.** List of *Streptococcus* RefSeq genomes used in this study with accession numbers.

603 **Table S3.** treeWAS results.

604

605 **Supplemental Figure legends**

606

607 **Figure S1.** Phylogenetic relationship of isolates sequenced for this study. Maximum likelihood  
608 phylogeny based on a core set of 425 putatively non-recombinant genes.

609

610 **Figure S2.** Phenotypic diversity within diverse clinical oral streptococcus isolates. Same as Figure  
611 1A, but with the mean ADS activity of *S. gordonii* DL1 included for reference as a yellow circle  
612 with a black dot in its center.

613

614 **Figure S3.** ADS operon and regulatory gene *flp/ntcA* genotype and ADS activity level. A.  
615 Maximum likelihood phylogeny of the ADS operon *ntcAarcABCDTRqueA* with heatmap  
616 indicating ADS activity level. Bootstrap values (%) are shown on major nodes. B. Example of the  
617 ADS operon and control elements showing protein-coding and intergenic regions used to build the  
618 phylogeny in A, from *S. gordonii* strain Challis (top), and an *S. gordonii* isolate from this study  
619 (bottom).

620

621 **Figure S4.** ADS operon genotype and ADS activity level. A. Maximum likelihood phylogeny of  
622 the ADS operon *arcABCDT* with heatmap indicating ADS activity level. B. Example of the ADS  
623 operon showing protein-coding and intergenic regions used to build the phylogeny in A, from *S.*  
624 *gordonii* strain Challis (top), and an *S. gordonii* isolate from this study (bottom) C. Gene consensus  
625 tree of the individual ADS operon gene trees (*arcA*, *arcB*, *arcC*, *arcD*, *arcT*) with heatmap  
626 indicating ADS activity level. Bootstrap values (%) are shown on major nodes.

627

628 **Figure S5.** ADS operon gene phylogenies and ADS activity phenotype. Each individual  
629 maximum-likelihood gene phylogeny (*ntcA*, *arcA*, *arcB*, *arcC*, *arcD*, *arcT*, *arcR*, *queA*) is  
630 presented adjacent to a heat map indicating the ADS activity level of each isolate.

631

632 **Figure S6.** *arcR* gene phylogenies and ADS activity phenotype. A. *arcR* phylogeny for all isolates  
633 sequenced in this study with a heat map indicating the ADS activity level of each isolate (same as  
634 in Figure S4) B. *arcR* phylogeny for all excluding the 5 *S. cristatus* isolates with short *arcR*  
635 sequences, with a heat map indicating the ADS activity level of each isolate.

636

637 **Figure S7.** Pyruvate oxidase maximum-likelihood phylogeny with antagonism heat map, same as  
638 Figure 3A, but with the *S. gordonii* strain Challis pyruvate oxidase gene *spxB* gene included for

639 reference as a black asterisk (15<sup>th</sup> from top) for a reference. Bootstrap values were <50% for major  
640 nodes.

641  
642  
643

## 644 References

645

- 646 1. **Hasslöf P, West CE, Karlsson Videhult F, Brandelius C, Stecksén-Blicks C.** 2013.  
647 Early Intervention with Probiotic *Lactobacillus paracasei* F19 Has No Long-Term Effect  
648 on Caries Experience. *Caries Res* **47**:559–565.
- 649 2. **Lin X, Chen X, Chen Y, Jiang W, Chen H.** 2015. The effect of five probiotic  
650 lactobacilli strains on the growth and biofilm formation of *Streptococcus mutans*. *Oral*  
651 *Diseases* **21**:e128–e134.
- 652 3. **Teanpaisan R, Piwat S, Dahlén G.** 2011. Inhibitory effect of oral *Lactobacillus* against  
653 oral pathogens. *Lett Appl Microbiol* **53**:452–459.
- 654 4. **Pham LC, van Spanning RJM, Röling WFM, Prosperi AC, Terefework Z, Cate ten**  
655 **JM, Crielaard W, Zaura E.** 2009. Effects of probiotic *Lactobacillus salivarius* W24 on  
656 the compositional stability of oral microbial communities. *Archives of Oral Biology*  
657 **54**:132–137.
- 658 5. **Madhwani T, McBain AJ.** 2011. Bacteriological effects of a *Lactobacillus reuteri*  
659 probiotic on in vitro oral biofilms. *Archives of Oral Biology* **56**:1264–1273.
- 660 6. **Comelli EM, Guggenheim B, Stingle F, Neeser J-R.** 2002. Selection of dairy bacterial  
661 strains as probiotics for oral health. *Eur J Oral Sci* **110**:218–224.
- 662 7. **Jiang Q, Stamatova I, Kainulainen V, Korpela R, Meurman JH.** 2016. Interactions  
663 between *Lactobacillus rhamnosus* GG and oral micro-organisms in an in vitro biofilm  
664 model. *BMC Microbiol* 1–11.
- 665 8. **Lee S-H, Kim Y-J.** 2014. A comparative study of the effect of probiotics on cariogenic  
666 biofilm model for preventing dental caries. *Arch Microbiol* **196**:601–609.
- 667 9. **Ravn I, Dige I, Meyer RL, Nyvad B.** 2012. Colonization of the Oral Cavity by Probiotic  
668 Bacteria. *Caries Res* **46**:107–112.
- 669 10. **Liu Y-L, Nascimento M, Burne RA.** 2012. Progress toward understanding the  
670 contribution of alkali generation in dental biofilms to inhibition of dental caries.  
671 *International Journal of Oral Science* **4**:135–140.
- 672 11. **Richards VP, Alvarez AJ, Luce AR, Bedenbaugh M, Mitchell M, Burne RA,**  
673 **Nascimento MM.** 2017. The microbiome of site-specific dental plaque of children with  
674 different caries status. *Infection and Immunity* IAI.00106–17.



- 675 12. **Gross EL, Beall CJ, Kutsch SR, Firestone ND, Leys EJ, Griffen AL.** 2012. Beyond  
676 *Streptococcus mutans*: dental caries onset linked to multiple species by 16S rRNA  
677 community analysis. PLoS ONE 7:e47722.
- 678 13. **Di Pierro F, Adami T, Rapacioli G, Giardini N, Streitberger C.** 2013. Clinical  
679 evaluation of the oral probiotic *Streptococcus salivarius* K12 in the prevention of  
680 recurrent pharyngitis and/or tonsillitis caused by *Streptococcus pyogenes* in adults. Expert  
681 Opinion on Biological Therapy 13:339–343.
- 682 14. **Burton JP, Chilcott CN, Moore CJ, Speiser G, Tagg JR.** 2006. A preliminary study of  
683 the effect of probiotic *Streptococcus salivarius* K12 on oral malodour parameters. Journal  
684 of Applied Microbiology 100:754–764.
- 685 15. **Di Pierro F, Di Pasquale D, Di Cicco M.** 2015. Oral use of *Streptococcus salivarius* K12  
686 in children with secretory otitis media: preliminary results of a pilot, uncontrolled study.  
687 IJGM 303–6.
- 688 16. **Dong Y, Chen YYM, Snyder JA, Burne RA.** 2002. Isolation and Molecular Analysis of  
689 the Gene Cluster for the Arginine Deiminase System from *Streptococcus gordonii* DL1.  
690 Applied and Environmental Microbiology 68:5549–5553.
- 691 17. **Dong Y, Chen Y-YM, Burne RA.** 2004. Control of Expression of the Arginine  
692 Deiminase Operon of *Streptococcus gordonii* by CcpA and Flp. J Bacteriol 186:2511–  
693 2514.
- 694 18. **Zeng L, Dong Y, Burne RA.** 2006. Characterization of cis-Acting Sites Controlling  
695 Arginine Deiminase Gene Expression in *Streptococcus gordonii*. J Bacteriol 188:941–949.
- 696 19. **Liu Y, Burne RA.** 2009. Multiple Two-Component Systems Modulate Alkali Generation  
697 in *Streptococcus gordonii* in Response to Environmental Stresses. J Bacteriol 191:7353–  
698 7362.
- 699 20. **Liu Y, Dong Y, Chen Y-YM, Burne RA.** 2008. Environmental and growth phase  
700 regulation of the *Streptococcus gordonii* arginine deiminase genes. Applied and  
701 Environmental Microbiology 74:5023–5030.
- 702 21. **Acevedo AM, Machado C, Rivera LE, Wolff M, Kleinberg I.** 2005. The inhibitory  
703 effect of an arginine bicarbonate/calcium carbonate CaviStat-containing dentifrice on the  
704 development of dental caries in Venezuelan school children. Journal of Clinical Dentistry  
705 16:63–70.
- 706 22. **Acevedo AM, Montero M, Rojas-Sanchez F, Machado C, Rivera LE, Wolff M,  
707 Kleinberg I.** 2008. Clinical evaluation of the ability of CaviStat in a mint confection to  
708 inhibit the development of dental caries in children. Journal of Clinical Dentistry 19:1–8.
- 709 23. **Kraivaphan P, Amornchat C, Triratana T, Mateo LR, Ellwood R, Cummins D,  
710 Devizio W, Zhang YP.** 2013. Two-Year Caries Clinical Study of the Efficacy of Novel

- 711 Dentifrices Containing 1.5% Arginine, an Insoluble Calcium Compound and 1,450 ppm  
712 Fluoride. *Caries Res* **47**:582–590.
- 713 24. **Nascimento MM, Browngardt C, Xiaohui X, Klepac-Ceraj V, Paster BJ, Burne RA.**  
714 2014. The effect of arginine on oral biofilm communities. *Molecular Oral Microbiology*  
715 **29**:45–54.
- 716 25. **Chakraborty B, Burne RA.** 2017. Effects of Arginine on *Streptococcus mutans* Growth,  
717 Virulence Gene Expression, and Stress Tolerance. *Applied and Environmental*  
718 *Microbiology* **83**:e00496–17–13.
- 719 26. **Huang X, Browngardt CM, Jiang M, Ahn S-J, Burne RA, Nascimento MM.** 2017.  
720 Diversity in Antagonistic Interactions between Commensal Oral Streptococci and  
721 *Streptococcus mutans*. *Caries Res* **52**:88–101.
- 722 27. **Nascimento MM, Gordan VV, Garvan CW, Browngardt CM, Burne RA.** 2009.  
723 Correlations of oral bacterial arginine and urea catabolism with caries experience. *Oral*  
724 *Microbiology and Immunology* **24**:89–95.
- 725 28. **Nascimento MM, Liu Y, Kalra R, Perry S, Adewumi A, Xu X, Primosch RE, Burne**  
726 **RA.** 2013. Oral Arginine Metabolism May Decrease the Risk for Dental Caries in  
727 Children. *J Dent Res* **92**:604–608.
- 728 29. **Huang X, Schulte RM, Burne RA, Nascimento MM.** 2015. Characterization of the  
729 Arginolytic Microflora Provides Insights into pH Homeostasis in Human Oral Biofilms.  
730 *Caries Res* **49**:165–176.
- 731 30. **Huang X, Schulte RM, Burne RA, Nascimento MM.** 2015. Characterization of the  
732 Arginolytic Microflora Provides Insights into pH Homeostasis in Human Oral Biofilms.  
733 *Caries Res* **49**:165–176.
- 734 31. **Aas JA, Paster BJ, Stokes LN, Olsen I, Dewhirst FE.** 2005. Defining the normal  
735 bacterial flora of the oral cavity. *J Clin Microbiol* **43**:5721–5732.
- 736 32. **Tritt A, Eisen JA, Facciotti MT, Darling AE.** 2012. An Integrated Pipeline for *de Novo*  
737 Assembly of Microbial Genomes. *PLoS ONE* **7**:e42304.
- 738 33. **Gurevich A, Saveliev V, Vyahhi N, Tesler G.** 2013. QUAST: quality assessment tool for  
739 genome assemblies. *Bioinformatics* **29**:1072–1075.
- 740 34. **Seemann T.** 2014. Prokka: rapid prokaryotic genome annotation. *Bioinformatics*  
741 **30**:2068–2069.
- 742 35. **Brohée S, van Helden J.** 2006. Evaluation of clustering algorithms for protein-protein  
743 interaction networks. *BMC Bioinformatics* **7**:488.
- 744 36. **Buchfink B, Xie C, Huson DH.** 2015. Fast and sensitive protein alignment using  
745 DIAMOND. *Nat Methods* **12**:59–60.

- 746 37. **Dongen SMV**. 2000. Graph clustering by flow simulation. PhD thesis. Utrecht University.
- 747 38. **Edgar RC**. 2004. MUSCLE: multiple sequence alignment with high accuracy and high  
748 throughput. *Nucleic Acids Res* **32**:1792–1797.
- 749 39. **Bruen TC, Philippe H, Bryant D**. 2006. A simple and robust statistical test for detecting  
750 the presence of recombination. *Genetics* **172**:2665–2681.
- 751 40. **Guindon S, Gascuel O, Rannala B**. 2003. A Simple, Fast, and Accurate Algorithm to  
752 Estimate Large Phylogenies by Maximum Likelihood. *Syst Biol* **52**:696–704.
- 753 41. **Katoh K, Misawa K, Kuma K-I, Miyata T**. 2002. MAFFT: a novel method for rapid  
754 multiple sequence alignment based on fast Fourier transform. *Nucleic Acids Res* **30**:3059–  
755 3066.
- 756 42. **Ewing GB, Ebersberger I, Schmidt HA, Haeseler von A**. 2008. Rooted triple consensus  
757 and anomalous gene trees. *BMC Evol Biol* **8**:118.
- 758 43. **Degnan JH, Rosenberg NA**. 2006. Discordance of species trees with their most likely  
759 gene trees. *PLoS Genet* **2**:e68.
- 760 44. **Strimmer K, Haeseler von A**. 1996. Quartet Puzzling: A Quartet Maximum-Likelihood  
761 Method for Reconstructing Tree Topologies. *Mol Biol Evol* **13**:964–964.
- 762 45. **Degnan PH, Yu Y, Sisneros N, Wing RA, Moran NA**. 2009. *Hamiltonella defensa*,  
763 genome evolution of protective bacterial endosymbiont from pathogenic ancestors. *Proc*  
764 *Natl Acad Sci USA* **106**:9063–9068.
- 765 46. **Yu G, Smith DK, Zhu H, Guan Y, Lam TT-Y**. 2017. ggtree: an rpackage for  
766 visualization and annotation of phylogenetic trees with their covariates and other  
767 associated data. *Methods Ecol Evol*, 1st ed. **8**:28–36.
- 768 47. **Brynildsrud O, Bohlin J, Scheffer L, Eldholm V**. 2016. Rapid scoring of genes in  
769 microbial pan-genome-wide association studies with Scoary. *Genome Biology* **17**:238.
- 770 48. **Collins C, Didelot X**. 2018. A phylogenetic method to perform genome-wide association  
771 studies in microbes that accounts for population structure and recombination. *PLoS*  
772 *Comput Biol* **14**:e1005958.
- 773 49. **Page AJ, Cummins CA, Hunt M, Wong VK, Reuter S, Holden MTG, Fookes M,**  
774 **Falush D, Keane JA, Parkhill J**. 2015. Roary: rapid large-scale prokaryote pan genome  
775 analysis. *Bioinformatics* **31**:3691–3693.
- 776 50. **Jensen A, Scholz CFP, Kilian M**. 2016. Re-evaluation of the taxonomy of the Mitis  
777 group of the genus *Streptococcus* based on whole genome phylogenetic analyses, and  
778 proposed reclassification of *Streptococcus dentisani* as *Streptococcus oralis* subsp.  
779 *dentisani* comb. nov., *Streptococcus tigurinus* as *Streptococcus oralis* subsp. *tigurinus*

- 780 comb. nov., and *Streptococcus oligofermentans* as a later synonym of *Streptococcus*  
781 *cristatus*. Int J Syst Evol Microbiol **66**:4803–4820.
- 782 51. **Huang X, Palmer SR, Ahn S-J, Richards VP, Williams ML, Nascimento MM, Burne**  
783 **RA.** 2016. A Highly Arginolytic *Streptococcus* Species That Potently Antagonizes  
784 *Streptococcus mutans*. Applied and Environmental Microbiology **82**:2187–2201.
- 785 52. **Richards VP, Palmer SR, Bitar PDP, Qin X, Weinstock GM, Highlander SK, Town**  
786 **CD, Burne RA, Stanhope MJ.** 2014. Phylogenomics and the Dynamic Genome  
787 Evolution of the Genus *Streptococcus*. Genome Biol Evol **6**:741–753.
- 788 53. **Chen YY, Weaver CA, Mendelsohn DR, Burne RA.** 1998. Transcriptional regulation of  
789 the *Streptococcus salivarius* 57.I urease operon. J Bacteriol **180**:5769–5775.
- 790

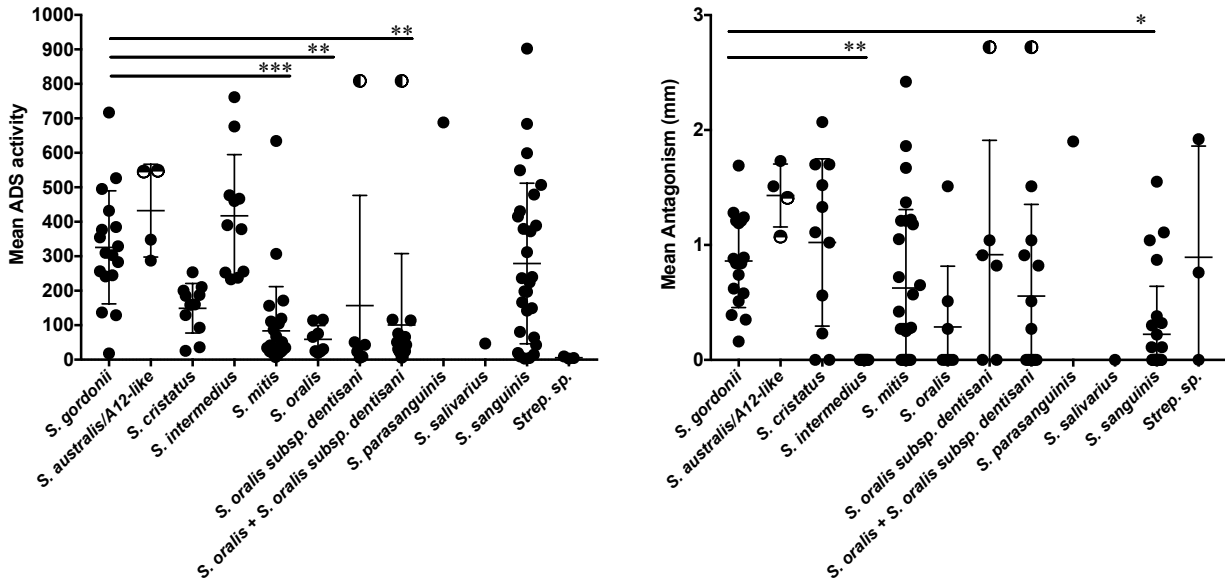

791

792

793

794

795

796

797

798

**Figure 1.** Phenotypic diversity within diverse clinical oral streptococcus isolates. A. Mean ADS activity of each isolate included in this study. B. Mean antagonism, measured as the diameter of the zone of inhibition of *S. mutans* UA159 by each isolate included in this study. Half-filled circles in *S. australis/A12-like* indicate the A12-like isolates. Half-filled circles in *S. oralis subsp. dentisani* and *S. oralis + S. oralis subsp. dentisani* indicate the same isolate. \* p < 0.05, \*\* p < 0.01, \*\*\* p < 0.001.



799

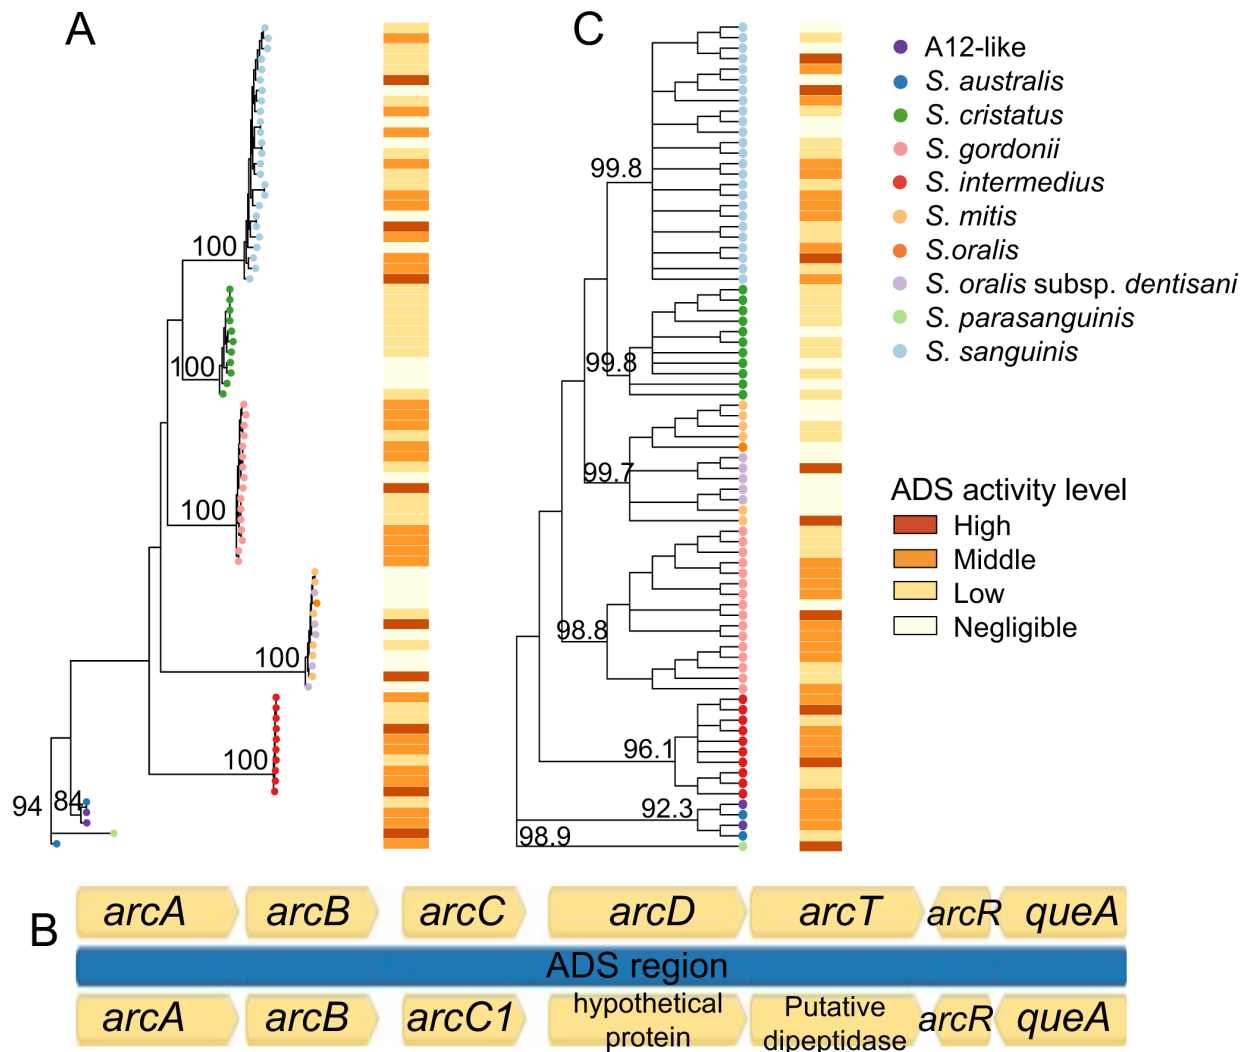

800  
801

802 **Figure 2.** ADS operon genotype and ADS activity level. A. Maximum-likelihood phylogeny of  
803 the ADS operon and regulatory elements *arcABC DTR queA* with heatmap indicating ADS  
804 activity level. B. Example of the ADS operon and control elements showing protein-coding and  
805 intergenic regions used to build the phylogeny in A, from *S. gordonii* strain Challis (top), and an  
806 *S. gordonii* isolate from this study (bottom). Note inconsistencies in gene annotation. C. Gene  
807 consensus tree of the individual ADS operon gene trees (*arcA*, *arcB*, *arcC*, *arcD*, *arcT*, *arcR*,  
808 *queA*) with heatmap indicating ADS activity level. Bootstrap values (%) are shown on major  
809 nodes.

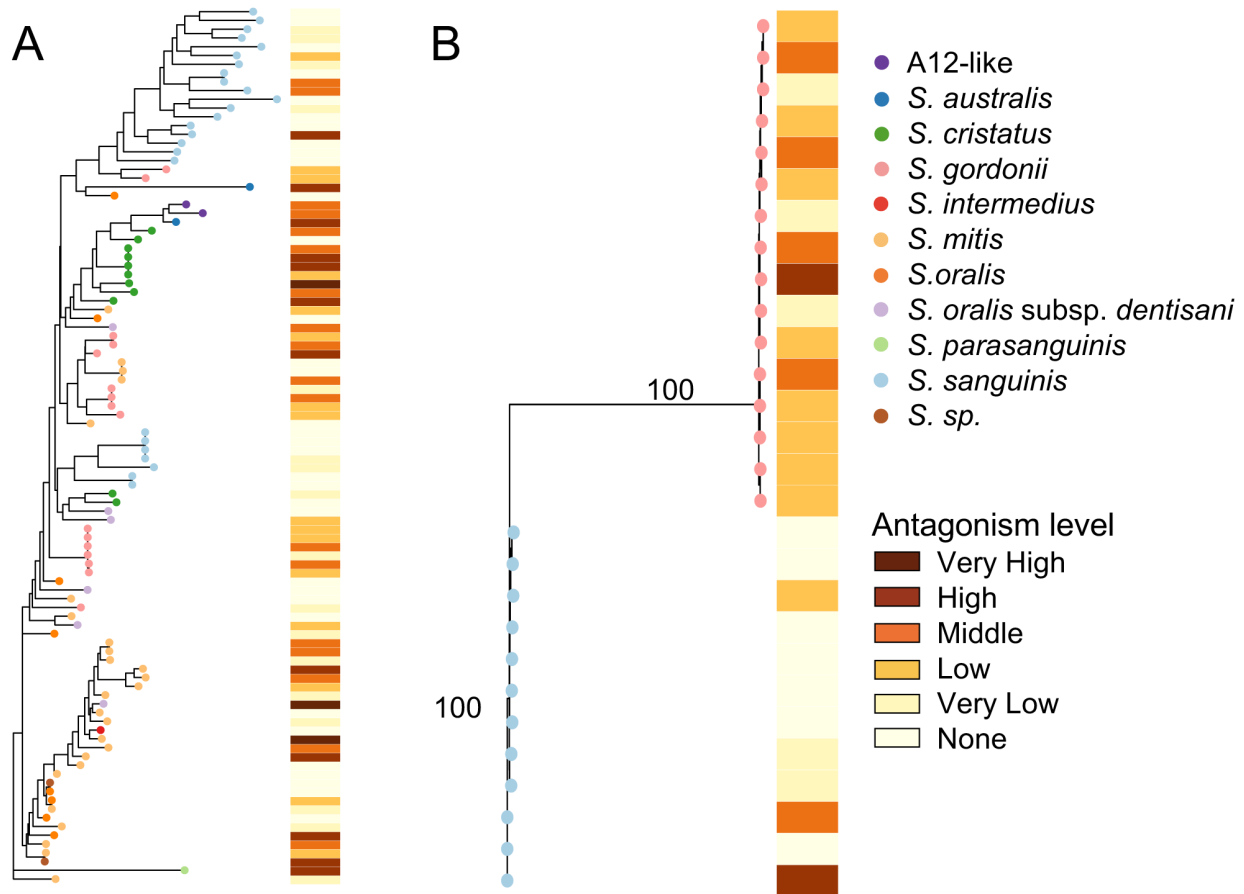

810  
811

812 **Figure 3.** Antagonism-associated genotype and phenotype. A. Maximum likelihood phylogeny  
813 of the pyruvate oxidase gene with heatmap indicating level of antagonism towards *S. mutans*.  
814 Bootstrap values were <50% for major nodes. B. Maximum likelihood phylogeny of the challisin  
815 gene with heatmap indicating level of antagonism towards *S. mutans*. Bootstrap values (%) are  
816 shown on major nodes.

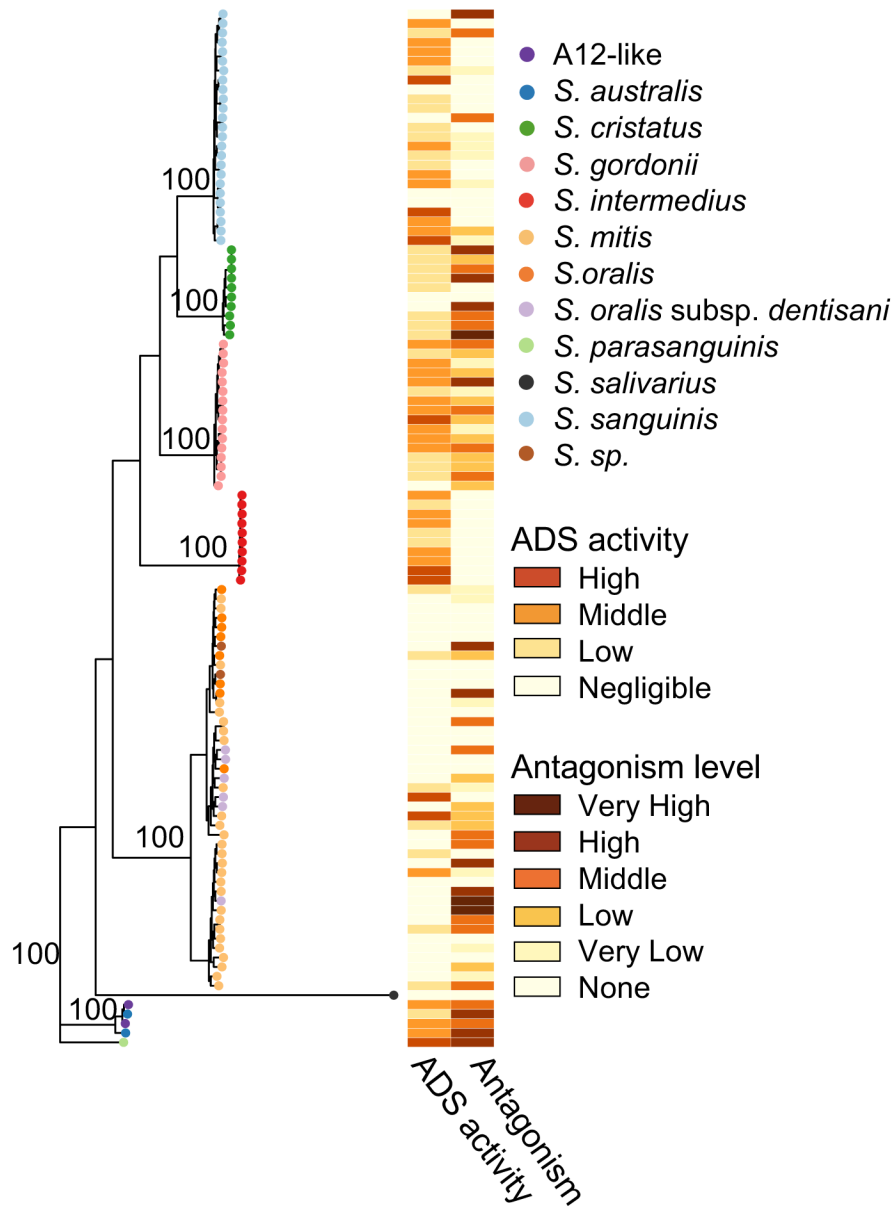

817

818

819 **Figure S1.** Phylogenetic relationship of isolates sequenced for this study. Maximum likelihood

820 phylogeny based on a core set of 425 putatively non-recombinant genes.

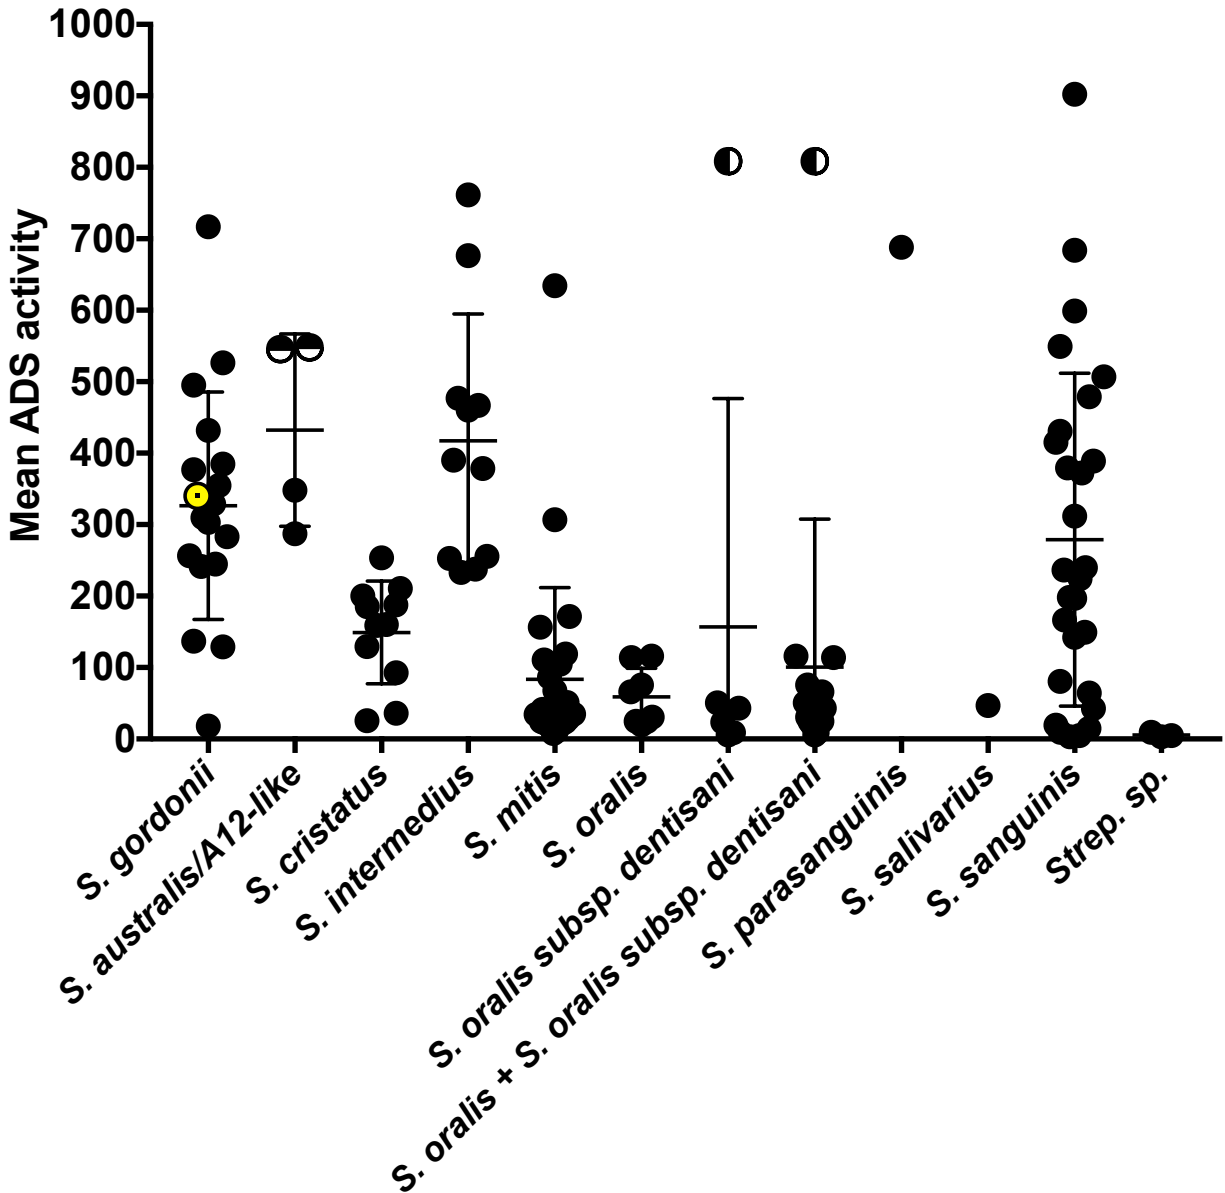

821  
822

823 **Figure S2.** Phenotypic diversity within diverse clinical oral streptococcus isolates. Same as  
824 Figure 1A, but with the mean ADS activity of *S. gordonii* DL1 included for reference as a yellow  
825 circle with a black dot in its center.

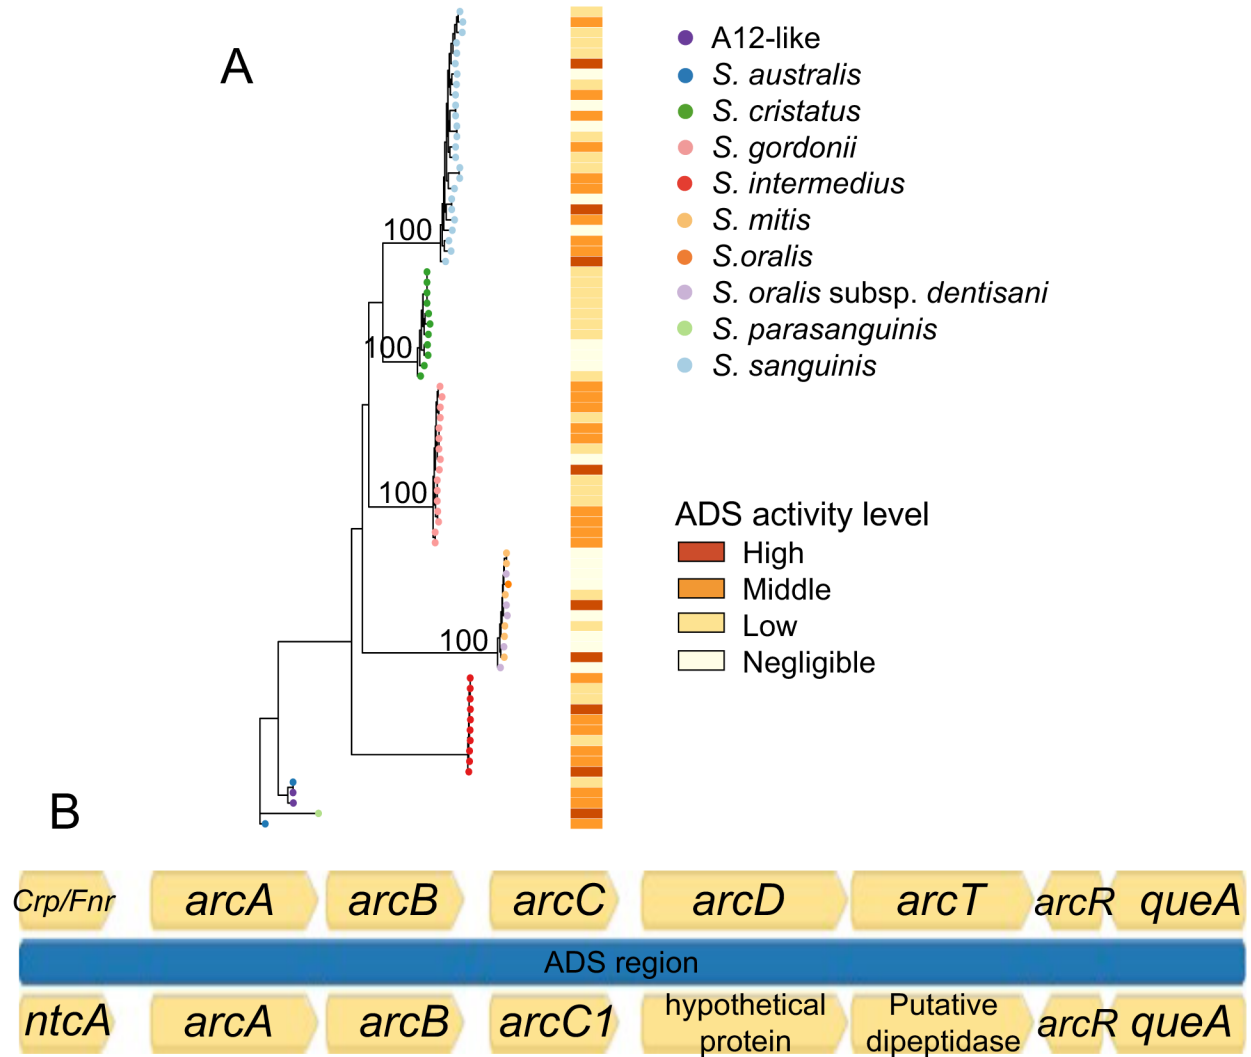

826  
827

828 **Figure S3.** ADS operon and regulatory gene *flp/ntcA* genotype and ADS activity level. A.  
829 Maximum likelihood phylogeny of the ADS operon *ntcAarcABCDTRqueA* with heatmap  
830 indicating ADS activity level. Bootstrap values (%) are shown on major nodes. B. Example of  
831 the ADS operon and control elements showing protein-coding and intergenic regions used to  
832 build the phylogeny in A, from *S. gordonii* strain Challis (top), and an *S. gordonii* isolate from  
833 this study (bottom).



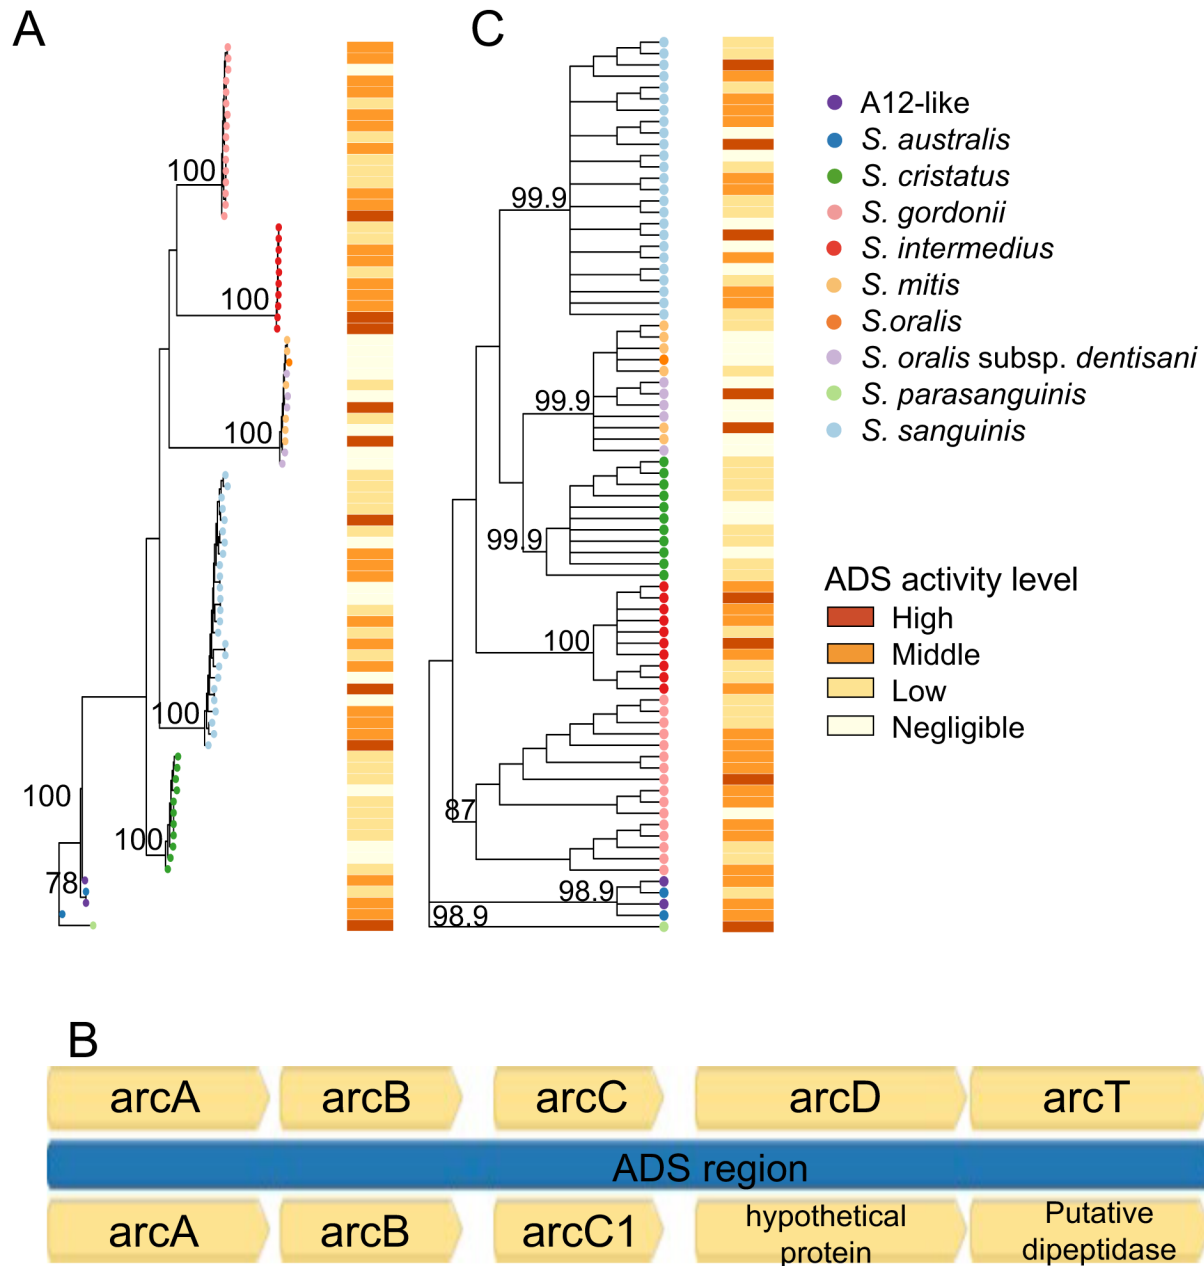

834  
835

836 **Figure S4.** ADS operon genotype and ADS activity level. A. Maximum likelihood phylogeny of  
837 the ADS operon *arcABCDT* with heatmap indicating ADS activity level. B. Example of the ADS  
838 operon showing protein-coding and intergenic regions used to build the phylogeny in A, from *S.*  
839 *gordonii* strain Challis (top), and an *S. gordonii* isolate from this study (bottom) C. Gene  
840 consensus tree of the individual ADS operon gene trees (*arcA*, *arcB*, *arcC*, *arcD*, *arcT*) with  
841 heatmap indicating ADS activity level. Bootstrap values (%) are shown on major nodes.

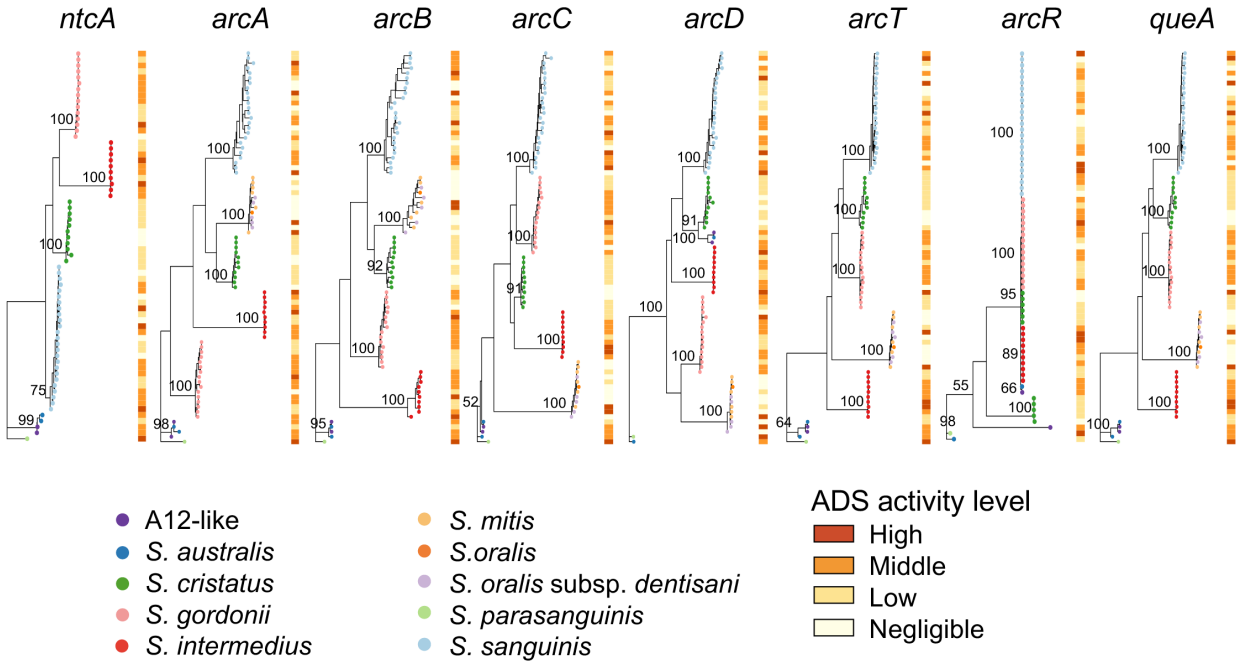

**Figure S5.** ADS operon gene phylogenies and ADS activity phenotype. Each individual maximum-likelihood gene phylogeny (*ntcA*, *arcA*, *arcB*, *arcC*, *arcD*, *arcT*, *arcR*, *queA*) is presented adjacent to a heat map indicating the ADS activity level of each isolate.

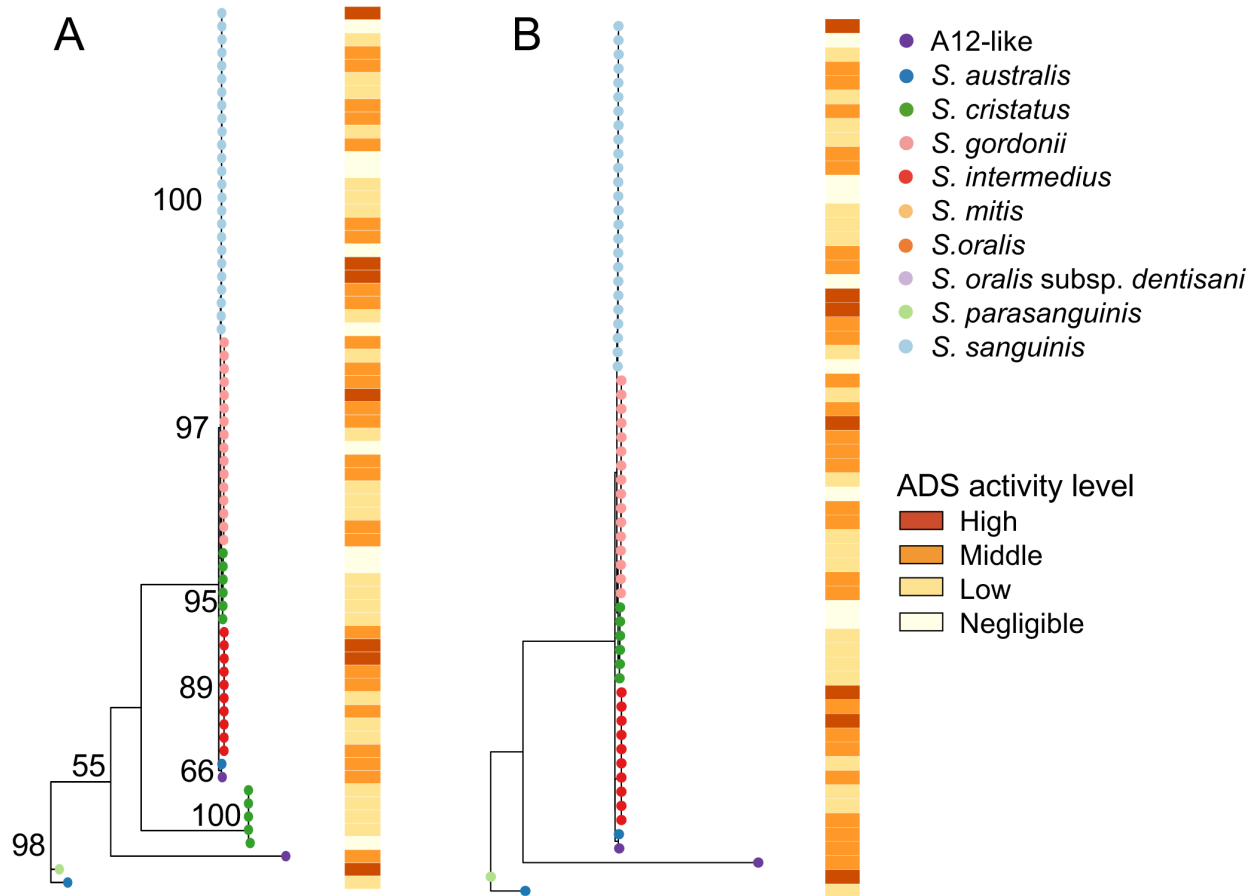

847  
848

849 **Figure S6.** *arcR* gene phylogenies and ADS activity phenotype. A. *arcR* phylogeny for all  
850 isolates sequenced in this study with a heat map indicating the ADS activity level of each isolate  
851 (same as in Figure S4) B. *arcR* phylogeny for all excluding the 5 *S. cristatus* isolates with short  
852 *arcR* sequences, with a heat map indicating the ADS activity level of each isolate.

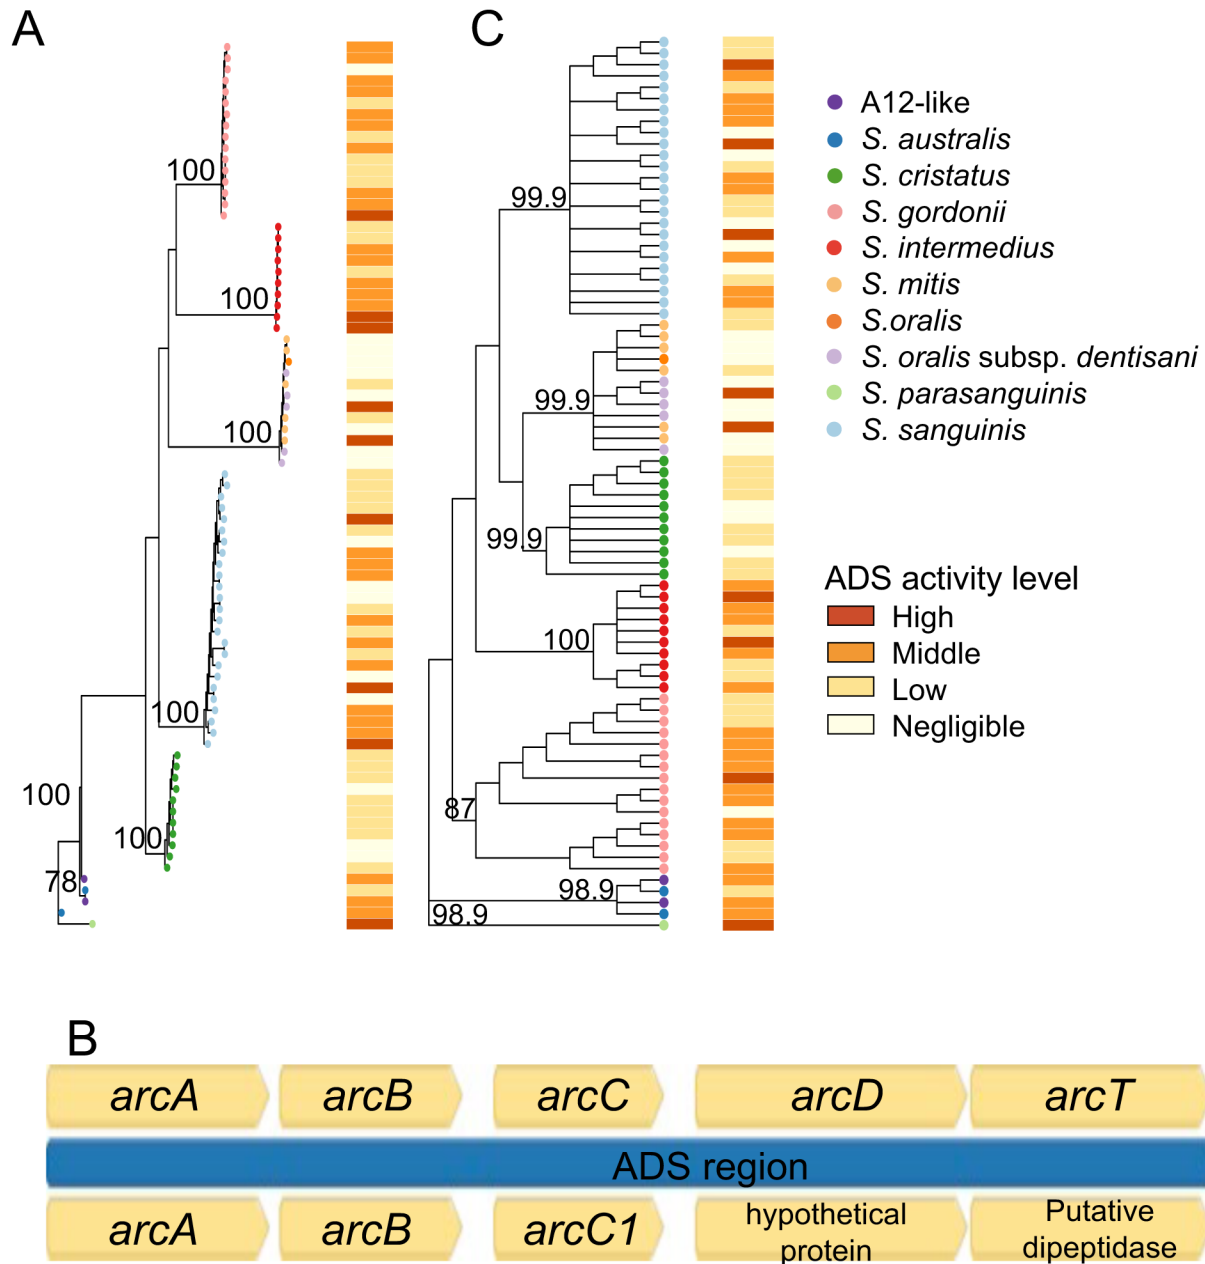

853  
854  
855  
856  
857  
858

**Figure S7.** Pyruvate oxidase maximum-likelihood phylogeny with antagonism heat map, same as Figure 3A, but with the *S. gordonii* strain Challis pyruvate oxidase gene *spxB* gene included for reference as a black asterisk (15<sup>th</sup> from top) for a reference. Bootstrap values were <50% for major nodes.
